# Supplementary material for: Order, please! Uncertainty in the ordinal-level classification of Chlorophyceae
Source: PeerJ journal article supplement (doi:10.7717/peerj.6899), 2019-05-15
Supplement: supplementary_alignments_trees.zip [file Results of AU topology test.docx]

Results of Shimodaira Approximately Unbiased (AU) tests for differences among topologies, based on 10000 bootstrap replicates. For each data set, two alternative topologies were tested. Within columns are the -lnL scores corresponding to each topology using that specific data set. The AU tests were done under the GTR+I+gamma model for the nucleotide data set, and the LG+I+gamma model for the amino acid data set, with parameter values estimated from the data prior to the AU tests. Boldface font indicates the best tree. Topologies marked by “*” are significantly different.

|  | Data set | |
| --- | --- | --- |
| topology | Concatenated plastid nucleotide (Fig. 2a) | Concatenated plastid amino acid (Fig. 2b) |
| Concatenated plastid nucleotide (Fig. 2a) | **878882.40197** | 238206.02947* |
| Concatenated plastid amino acid (Fig. 2b) | 879859.37477* | **238064.11712** |

* p<0.05

In summary, each data set supports ‘its own’ topology over the alternative, and the difference is statistically significant in both cases.
