# Supplementary material for: Order, please! Uncertainty in the ordinal-level classification of Chlorophyceae
Source: PeerJ. 2019 May 15;7:e6899. doi: 10.7717/peerj.6899 (PMC6525593; doi:10.7717/peerj.6899)
Supplement: Table S1 — Blue color indicates presence of a gene, white indicates absence, and gray uncertainty –typically applies to incompletely sequenced genomes, in which the gene’s sequence was not recovered from the data but may still be present in the genome. Numbers in cells represent insertion of an intron at a particular nucleotide position. In cases where trans-spliced introns occur, TR indicates trans and C cis (if other introns in the same gene are cis-spliced, e.g., in psaA); in all other cases cis-splicing is assumed without indication. Gray font indicates uncertainty in designation –for example “TR” in gray means that the intron is putatively trans-spliced based on information from related taxa, but direct evidence is not available. Asterisks mark genes present in the Inverted Repeat (IR) region; “part” specifies cases where only part of a gene is in the IR. The first rpl32 exon is not annotated in most genomes because of its short length and lack of conservation, in which case the lighter blue indicates the assumption that the exon is present in the genome but was not found. [file peerj-07-6899-s007.xlsx]

## Sheet: Chlorophyceae
species	Tetradesmus obliquus	Ankyra judai	Atractomorpha echinata	Bracteacoccus aerius	Bracteacoccus giganteus	Bracteacoccus minor	Chlorotetraedron incus	Chromochloris zofingiensis	Kirchneriella aperta	Follicularia botryoides	Hariotina reticulata	Mychonastes homosphaera	Mychonastes jurisii	Neochloris aquatica	Ourococcus multisporus	Pediastrum duplex var. asperum	Pseudomuriella schumacherensis	Rotundella rotunda	Dictyochloris fragrans	Elakatothrix viridis	Cylindrocapsa geminella	Golenkinia longispicula	Microspora sp	Parallela transversalis	Spermatozopsis similis	Trochiscia hystrix	Treubaria triappendiculata	Jenufa perforata	Jenufa minuta	Borodinellopsis texensis	Carteria crucifera	Carteria sp	Carteria cerasiformis	Characiochloris acuminata	Chloromonas typhlos	Chlamydomonas peterfii	Chlamydomonas applanata	Chlorococcum tatrense	Chlamydomonas reinhardtii	Chloromonas perforata	Chlorogonium capillatum	Chloromonas radiata	Chloromonas rosae	Chlorosarcinopsis eremi	Desmotetra stigmatica	Dunaliella salina	Gonium pectorale	Haematococcus lacustris	Hafniomonas laevis
commonly used synonyms	Acutodesmus obliquus, Scenedesmus obliquus							Chlorella zofingiensis, Muriella zofingiensis, Bracteacoccus cinnabarinus, Mychonastes zofingiensis		Planktosphaeria botryoides	Coelastrum reticulatum	Chlorella homosphaera	Dactylosphaerium jurisii				Dictyococcus schumacherensis							Radiofilum transversale											previously incorrectly designated as Chlamydomonas nivalis					Chlamydomonas perforata		Chlamydomonas radiata			Chlorosarcina stigmatica
authority	(Turpin) M.J.Wynne	(G.M.Smith) Fott	L.R.Hoffmann	H.W.Bischoff & Bold	H.W.Bischoff & Bold	(Schmidle ex Chodat) Petrová	(Teiling) Komárek & Kovácik	(Dönz) Fucíková & L.A.Lewis	Teiling	(W.Herndon) J.Komárek	P.A.Dangeard	(Skuja) Kalina & Puncochárová	(Hindák) Krienitz, C.Bock, Dadheech & Proschold	Starr	H.W.Bischoff & Bold	(A.Braun) Hansgirg	Fuciková, Rada & L.A.Lewis	Fuciková, P.O.Lewis & L.A.Lewis	Vischer	(J.W.Snow) Printz	Wolle	Hegewald & Schnepf	Thuret	(Brébisson) Novis, M.Lorenz, Broady & E.A. Flint	H.R.Preisig & M.Melkonian	(Reinsch) Hansgirg	C.Bernard	Nemcová, M.Eliás, Skaloud & Neustupa	Nemcová, M.Eliás, Skaloud & Neustupa	Dykstra	Korshikov	Diesing	H.Nozaki, K.Aizawa & M.M.Watanabe	K.W.Lee & Bold	(Gerloff) Matsuzaki, Y.Hara & Nozaki	Gerloff	Pringsheim	Archibald	P.A.Dangeard	(Pascher & Jahoda) Gerloff & H.Ettl	H.Nozaki, M.M.Watanabe & K.Aizawa	(T.R.Deason & Bold) T.Pröschold, B.Marin, U.W.Schlösser & M.Melkonian	H.Ettl	Chantanachat & Bold	(T.R.Deason) T.R.Deason & G.L.Floyd	(Dunal) Teodoresco	O.F.Müller	(Girod-Chantrans) Rostafinski	Nakada, Suda & Nozaki
GenBank #	NC_008101	KT369399	KT369370-440	KT199254	KT625421	KT199253	KT199252	KT199251	KT199250	MG778351 -407	KY792638-700	KT199249	KT625411	KT199248	KT369441-509	MF536514-522	KT199256	KT369317-369	MG778235-96	MG778297 -350	MG778186 -229	KT625092-150	MG778408-09	MG786420	MG778500	MG778501-32	KT625410	KT625413	KT625414	MG778120-27	KT624870-KT624932	KT625419	KT625420	KT625418	KT624630-KT624716	KT624933-KT625007	KT625417	MG778173	FJ423446	KT625416	KT625085-091	KT625008-084	MG778174-84	MG778185	MG778230 -34	GQ250046	AP012494	KT625205-298	KT625415
18S Genbank #	AJ249515.1	U73469.1	U73470.1	U63101.1	U63099.1	U63097.1	AF288363.1	HQ902933.1	AJ271859.1	KC145433.1	AH012395.2	GQ477056.1	AF106074.1	M62861.1	AF277648.1	AY779859.1	HQ292768.1	KC145434.1	AF367861.1	AY008844.1	U73471.1	AF499923.1	AF387160.1	AF387161.1	X65557.1	AF277651.1	LC192143.1	HM563743.1	HM563744.1	KM020129.1	D86501.1	AF182817.1	AB688624.1	AF395435.1	U57696.1	U70788.1	FR865616.1	MG991815.1	AB511834.1	U70794.1	AB278612.1	U57697.1	U70796.1	AB218706.1	AB218711.1	EF473745.1	LC066324.1	AF159369.1	AB101517.1
atpA						753								489							753		492	492	583	492, 756		498, 762				489					753									492		489, 1219	483
atpB									522							522		1173			687																					1173				1443
atpE
atpF														* part								61
atpH														*
atpI		73																				474
ccsA
cemA														* part								239, 906					* part				136		136
clpP
petB																				102
petD	247				247
petG
petL
psaA	TR 269	TR 89, 269	TR 89, 269	TR 89, 269	TR 89, 269, C 1797	TR 89, 269	TR 89, 269, C 1605	TR 89, 269	TR 89, 269	TR 89, 269	TR 89, 269	TR 89, 269	TR 89, 269	TR 89, 269, C 1104	TR 89, 269, C 1797	TR 89, 269, C 1797	TR 89, 269	TR 89, 269	TR 90, 270	TR 90, 270, 1605	TR 90, 270	TR 269	TR 90, 270	TR 90, 270	TR 90, 270	TR 89, 269, C 1605, 1797	TR 89, 269	TR 89, 269, C 1605, 1797	TR 90, 270, C 1104, 1797	TR 90, 270	1098, 1599	TR 89, 269		TR 89, 269	TR 269, C 543, 1605	TR 89, 269	TR 90, 270, C 1605, 1797	TR 90, 270, C 981	TR 90, 270	TR 90, 270	TR 89, 269	TR 269	TR 270; C 981, 1104, 1605	TR 90, 270	TR 90, 270	TR 90, 270, C 2040	TR 90, 270	TR 89, 269, C 1605	TR *92, 272, C 1107
psaB	1772						939											1772	935			1770				294, 891, 1773	294	294, 939, 1772	297, 939, 1772	294		1772					184	1956					1158, 1773			939	1772
psaC																			25	25								25		25		25
psaJ																						66
psbA	276, 414, 548	*			* 548, 570, 983	*	276		* 179, 548, 631, 813	276	276, 416, 549, 900	*	*	276, 414, 501, 525, 549, 570, 645, 744, 756	* 179, 276, 424, 500, 513, 548, 570, 645, 790		* 384, 525	179, 525, 572, 645	499, 548			271, 414, 499, 548, 570, 782	145, 645		*	180, 525, 846	*	408, 548, 570, 645, 898	180, 570, 645	603	548, 570, 756	* 525, 743		* 384	759		* 276, 384, 525, 756	276, 384, 570, 645, 846	* 180, 384, 525, 756	276, 384	414		387	* 384, 513, 756, 846		276, 384, 414, 570, 900	*	208, 468, 525, 603	384, 414, 525, 548, 645, 756, 790, 898
psbB																						356				600			573, 600	600										356								27, 600, 1473	600
psbC					990						543, 882, 972, 1053			543, 1053	717							606	882			?T 543, C 882			543, 882, 972						491		543	543, 882, 1056		543, 882			543, 882	882		543, 882		543	543, 882
psbD							570							744									744					545	726			554, 749					546	549		548	545		562, 741, 825			567			592
psbE
psbF
psbH
psbI
psbJ
psbK
psbL																																											48
psbM
psbN
psbT																																											58
psbZ																																			67								67
rbcL																							350, 462, 699						612		1242	1219			699					* 720	699		699, 1212						699
rpl14
rpl16
rpl2																										22	22
rpl20
rpl23
rpl36
rpl5
rpoA																															238		238
rpoBa
rpoBb
rpoC2
rps11
rps12
rps14
rps18
rps19
rps3
rps4																																							* part								* part
rps7																						70
rps8
rps9
tufA
ycf3
rrf	*	*	*	*	*	*	*	*	*	*	*	*	*	*	*	*	*	*	*	*	*	*	*		*	*	*		*	*	*	*	*	*	*	*	*	*	*	*	*	*	*	*	*	*	*	*	*
rrl	* 2052, 2722	*	*	*	*	*	* 2775	*	* 835, 2093, 2101, 2434, 2622, 2672, 2765	*	*	*	*	* 1506, 2180, 2293, 2386	*	*	* 2545	*	*	* min. 4 introns	* ?	* 1528, 2226, 2753	* 2002, 2010, 2580	2038, 2048, 2618	* 1973, 2543	* 2426, 2663	*	852, 1374, 2051, 2577, 2628	* 2153, 2823	* 297, 1107, 1967, 2295	*	* 2023, 2694	* 1174, 2277, 2285, 2855, 2949	* 1962, 2533, 2626	* 2855	* 2668	* 2521	* 2029, 2697	* 3part, 2603	*	* 2021	*	* 2076, 2411, 2596	*	*	* 276, 1092, 1994, 2322, 2509, 2561, 2659	* 3part	* 840, 1205, 2073, 2743	* 1941, 2611
rrs	*	*	*	*	*	*	* 477	*	* 1053	*	*	*	*	* 474, 497, 659, 1043	*	*	*	*	*	*	*	*	*		* 906, 1046	*	*	424, 483, 1073	* 408	* 766, 972	*	* 463	* 909	* 895	* 905	*	*	* 503	*	*	*	*	*	*	*	* 415, 476, 740, 881	*	* 752, 900	*
rpoBc
rpoBd
ftsH
infA																				?						?
ycf12																																		*
rps2	split?												split
psaM
rpl12														*													*
rpl32	TR 12	TR 12	TR 12	TR 12	TR 12	TR 12	TR 12	TR 12	TR 12		TR 12	TR 12	TR 12	TR 12	TR 12	TR 12	TR 12	TR 12		12		TR 13	12			12	TR 12	TR 12	12	12				TR 13			12	12		TR 13	TR 13					12		? 13	13
rpoC1																						507																	split									a and b
ycf1																																						* part
ycf4																																											606
chlB																																								* part
chlN																																											858
chlL																										213		210																		876
petA
trnA(ugc)	*	*		*	*	*	*	*	*			*	*	*			*					*	*		*	*	*		*	*	*	*	*	*	*	*	*	*	*	*	*	*	*	*	*	*	*	*	*
trnC(gca)
trnD(guc)
trnD(guc)
trnE(uuc)
trnE(uuc)
trnF(gaa)
trnG(gcc)
trnG(gcc)
trnG(ucc)
trnH(gug)
trnI(cau)																																	* part
trnI(gau)	*	*		*	*	*	*	*	*			*	*	*			*					*	*		*	*	*		*	*		*	*	*		*	*	*	*	*	*	*	*	*	*	*	*	*	*
trnI(gau)
trnK(uuu)
trnK(cuu)
trnL(caa)
trnL(uaa)	34			34	34	34	34	34	34					34			34					34					34	34	34			34
trnL(uag)
trnMe(cau)
trnMf(cau)
trnM
trnN(guu)
trnN(guu)
trnP(ugg)
trnQ(uug)
trnQ(uug)
trnR(acg)
trnR(acg)
trnR(ucg)
trnR(ucu)
trnS(gcu)							*	*	*			*	*	*			*																														*
trnS(gcu)
trnS(gga)
trnS(aga)
trnS(uga)
trnT(ugu)
trnV(uac)
trnV(uac)
trnV(gac)
trnW(cca)
trnY(gua)																											*
trnT(agu)
trnT(ggu)
trnR(ccu)
trnR(ccg)
trnL(aag)
trnL(gag)
rpl19
ycf47
accD
cysA
psaI
chlI
cysT
minD
ycf20
ycf62/tilS
ycf62/tilSb
tscA RNA
[truncated: 19 more columns]
