# Supplementary figures and images for: Order, please! Uncertainty in the ordinal-level classification of Chlorophyceae
Source: PeerJ journal article supplement (doi:10.7717/peerj.6899), 2019-05-15

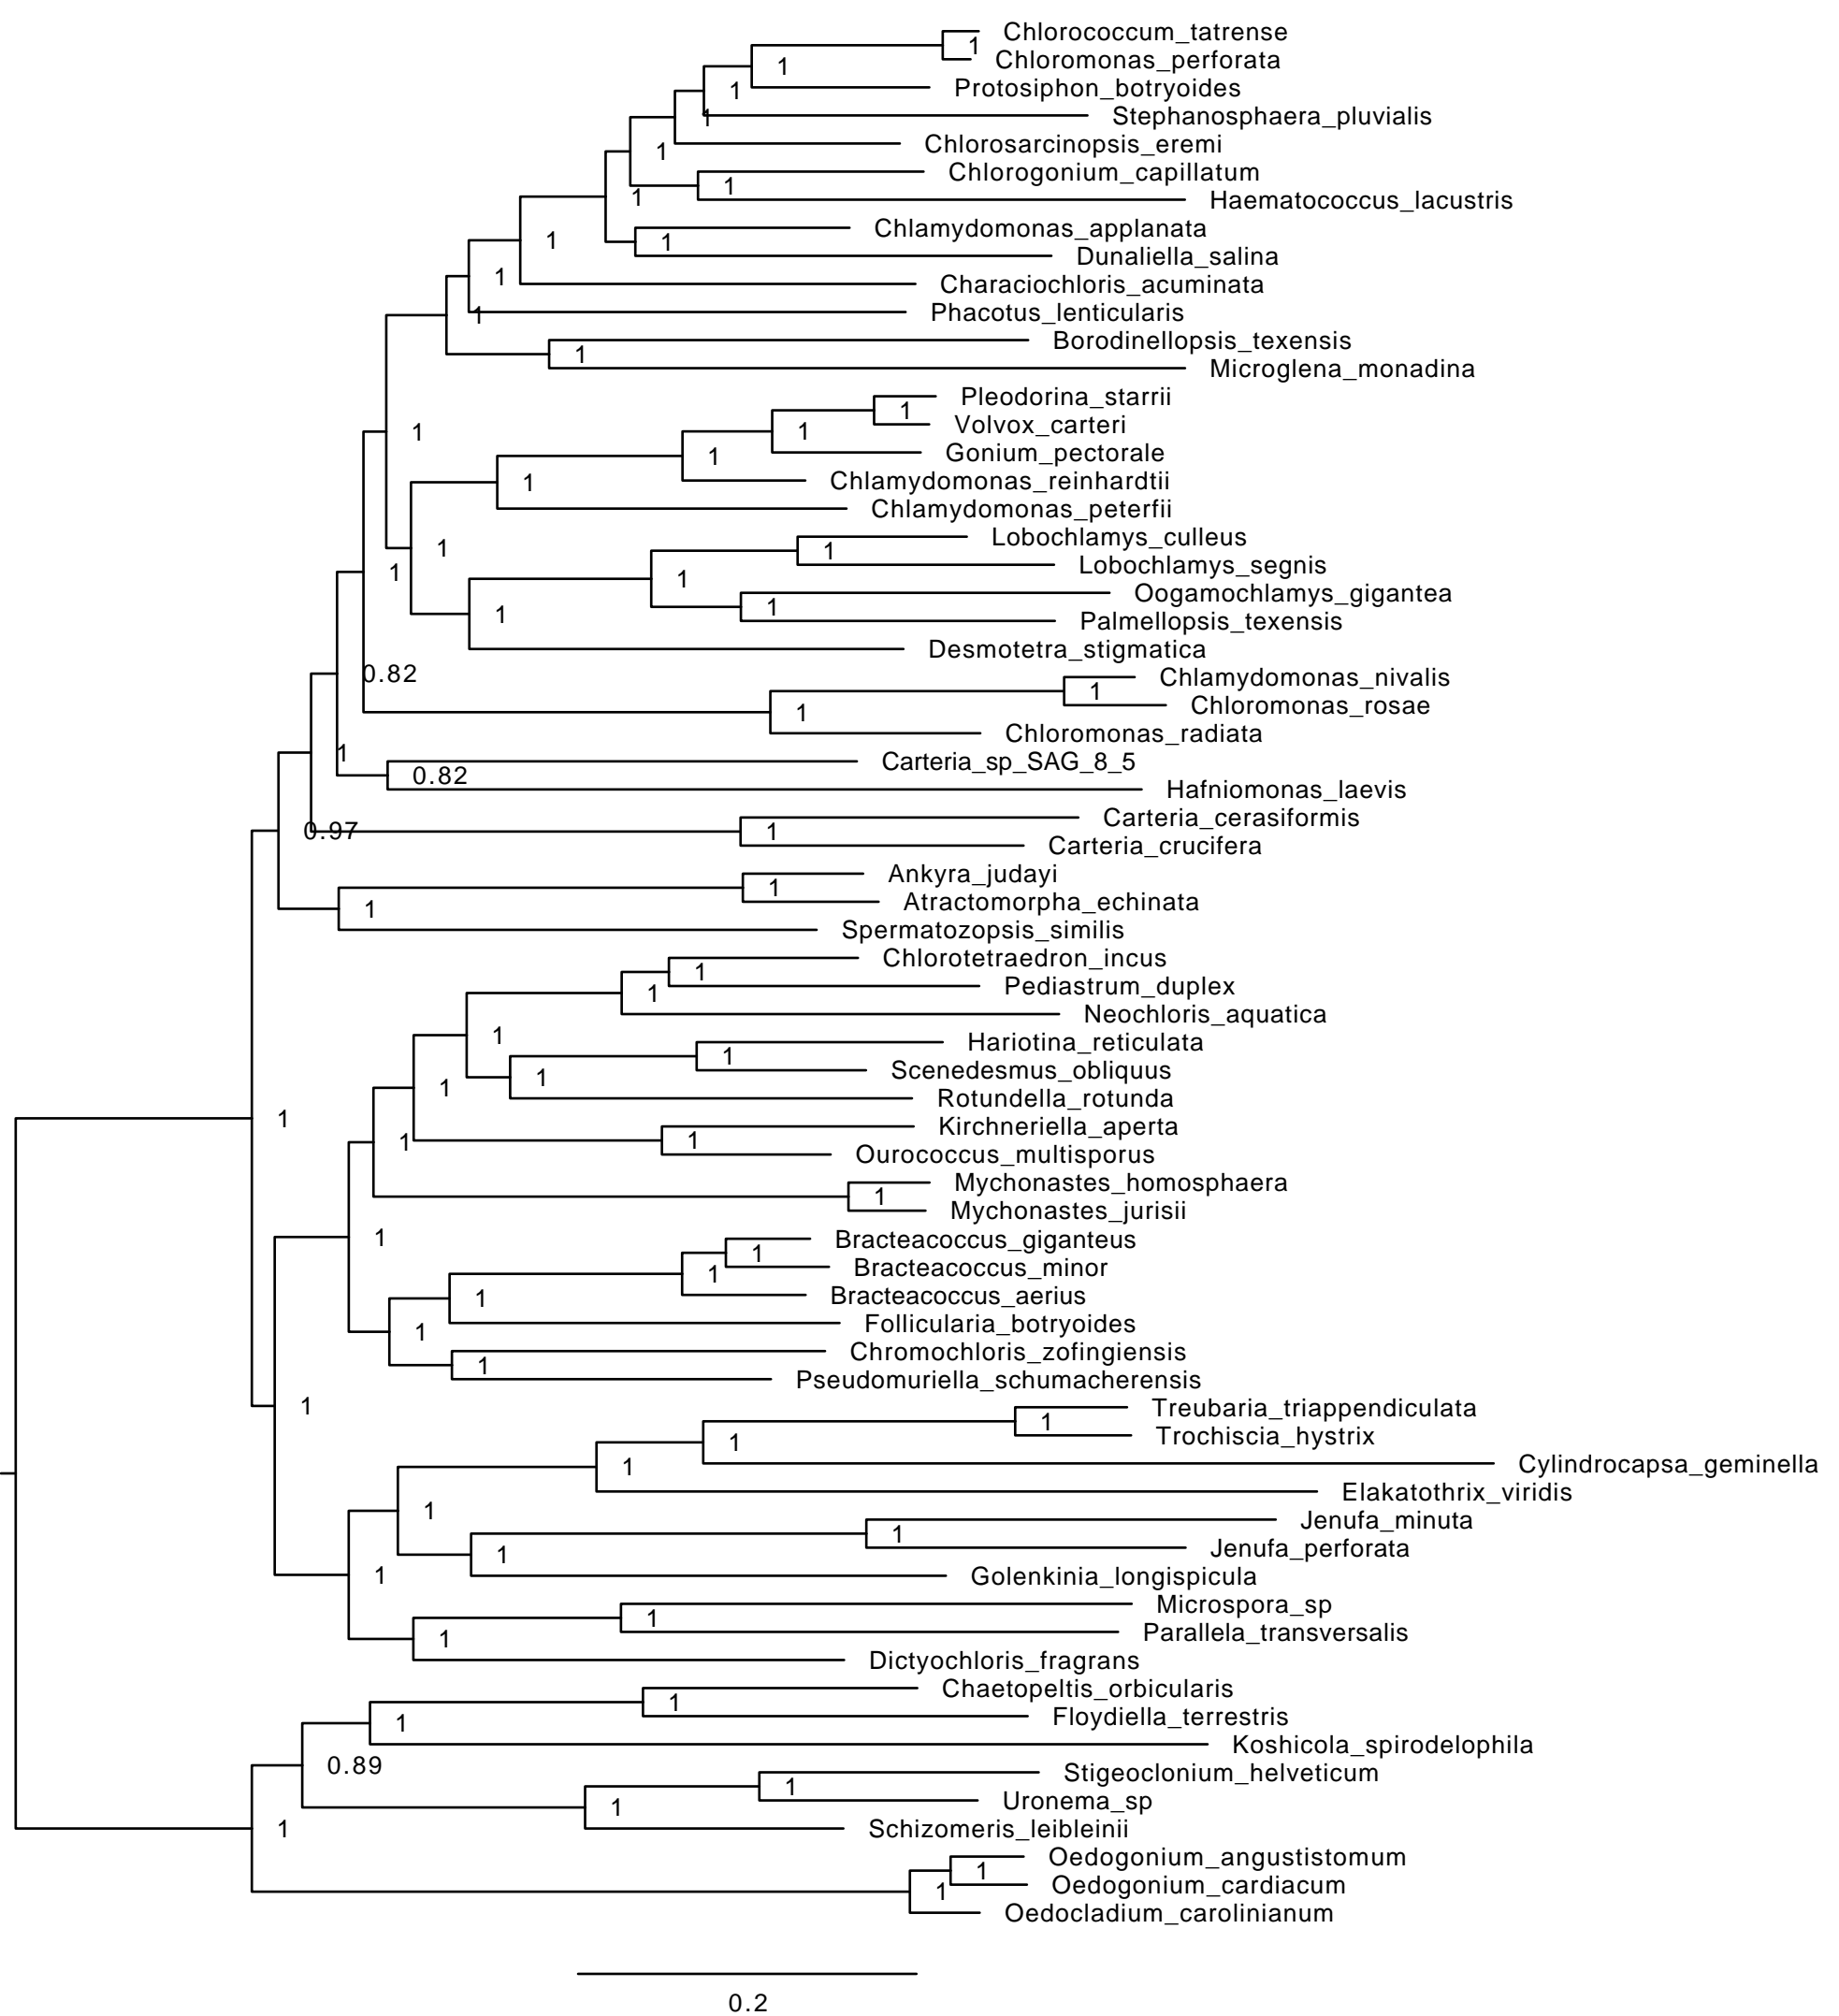

Supplement: supplementary_alignments_trees.zip [file 18Splastid.con.pdf › supplementary_alignments_trees/18Splastid_combined/18Splastid.con.pdf]

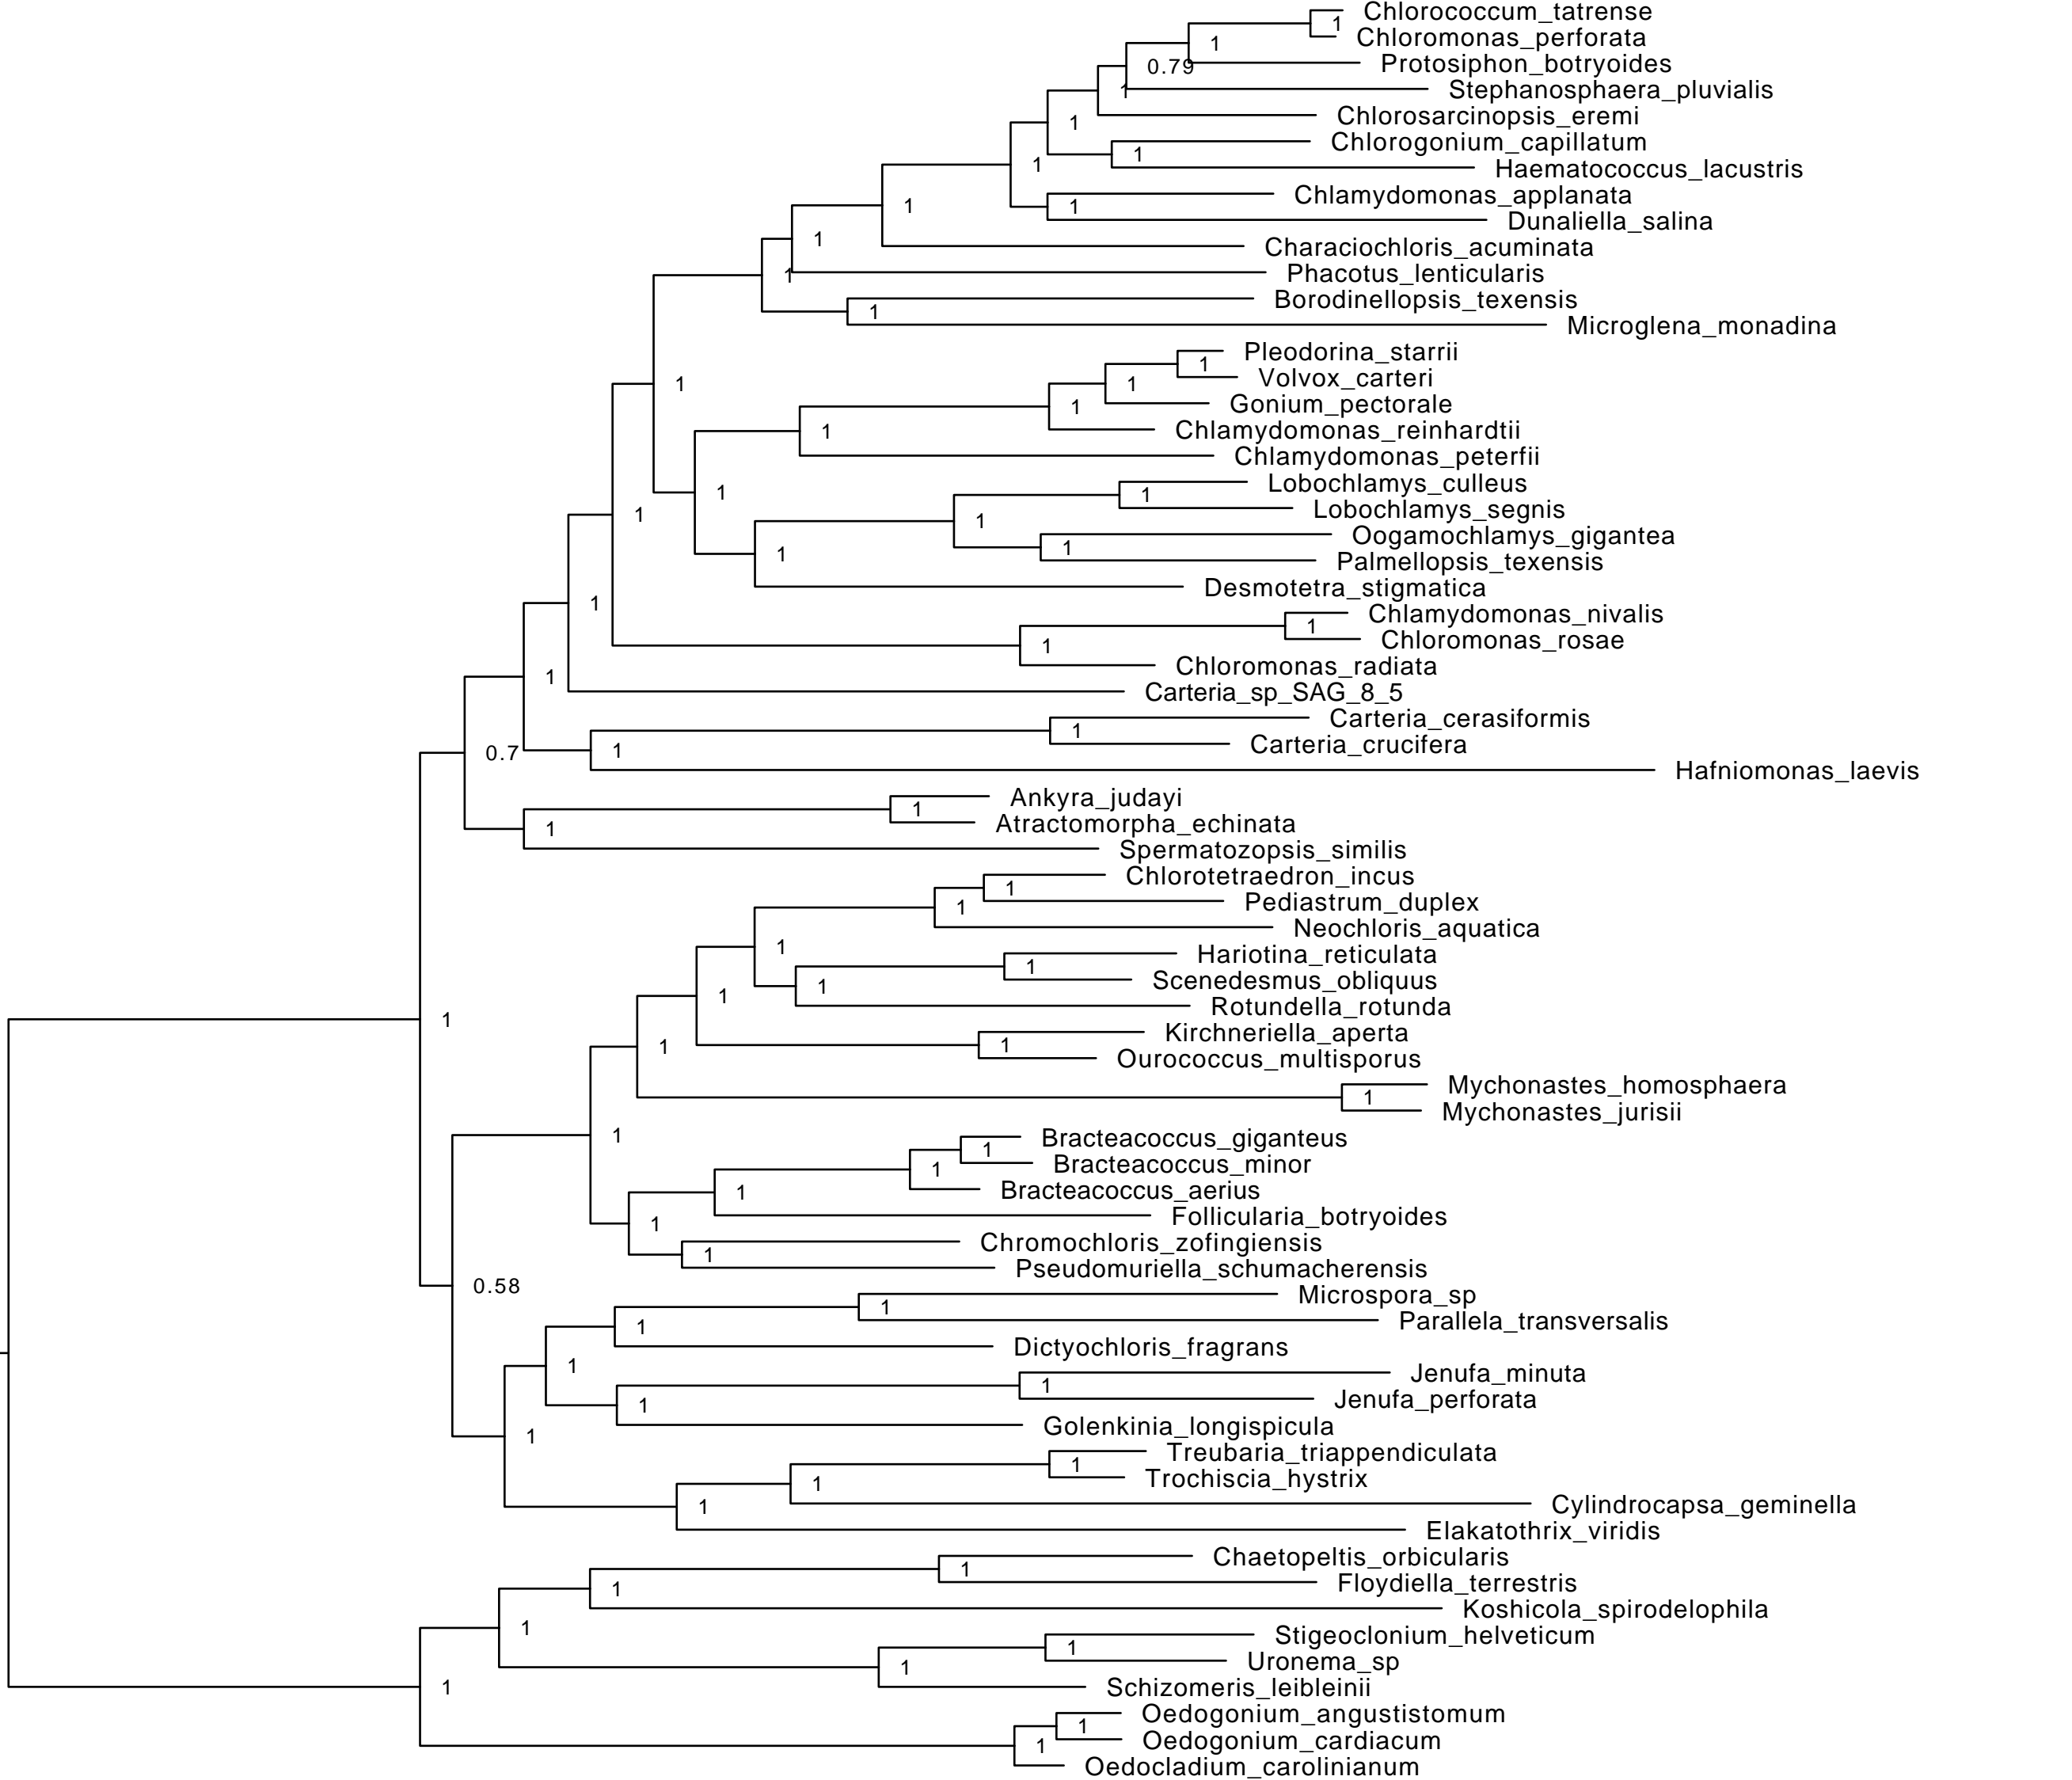

0.06

Supplement: supplementary_alignments_trees.zip [file 1st2ndpositions.pdf › supplementary_alignments_trees/1st_and_second_positions_only/1st2ndpositions.pdf]

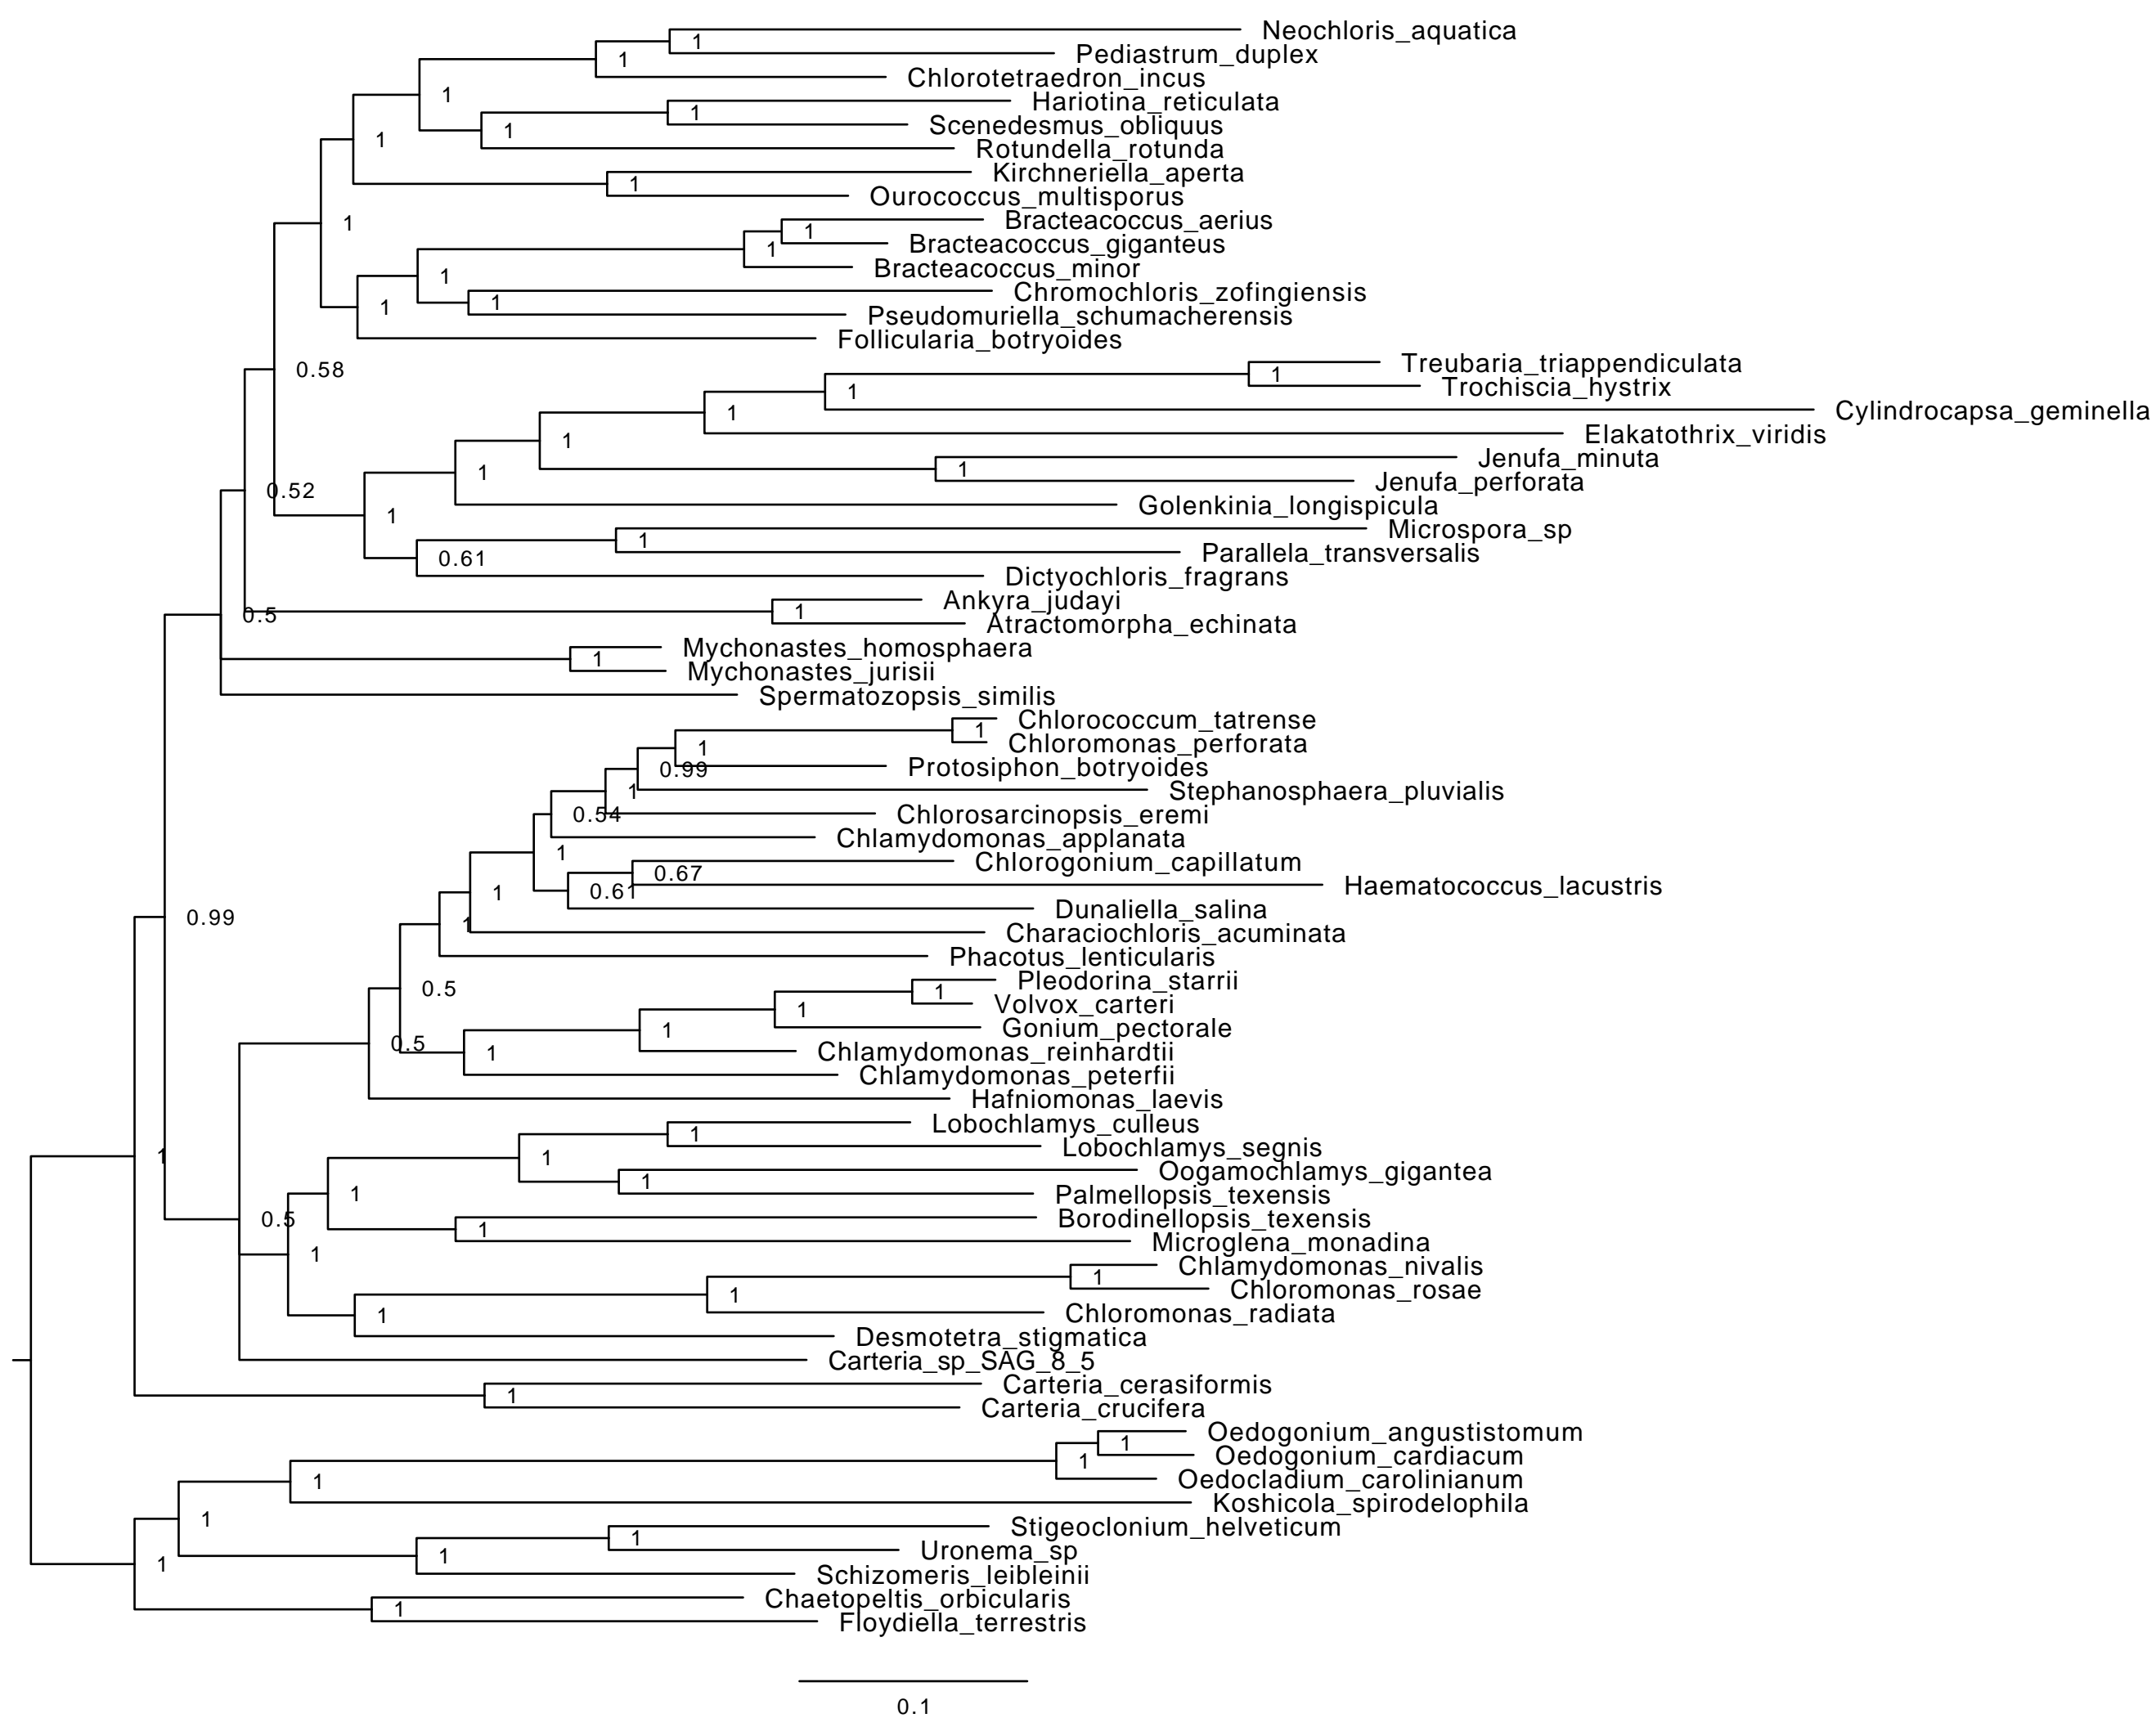

Supplement: supplementary_alignments_trees.zip [file 3rdpositions.pdf › supplementary_alignments_trees/3rd_positions_only/3rdpositions.pdf]

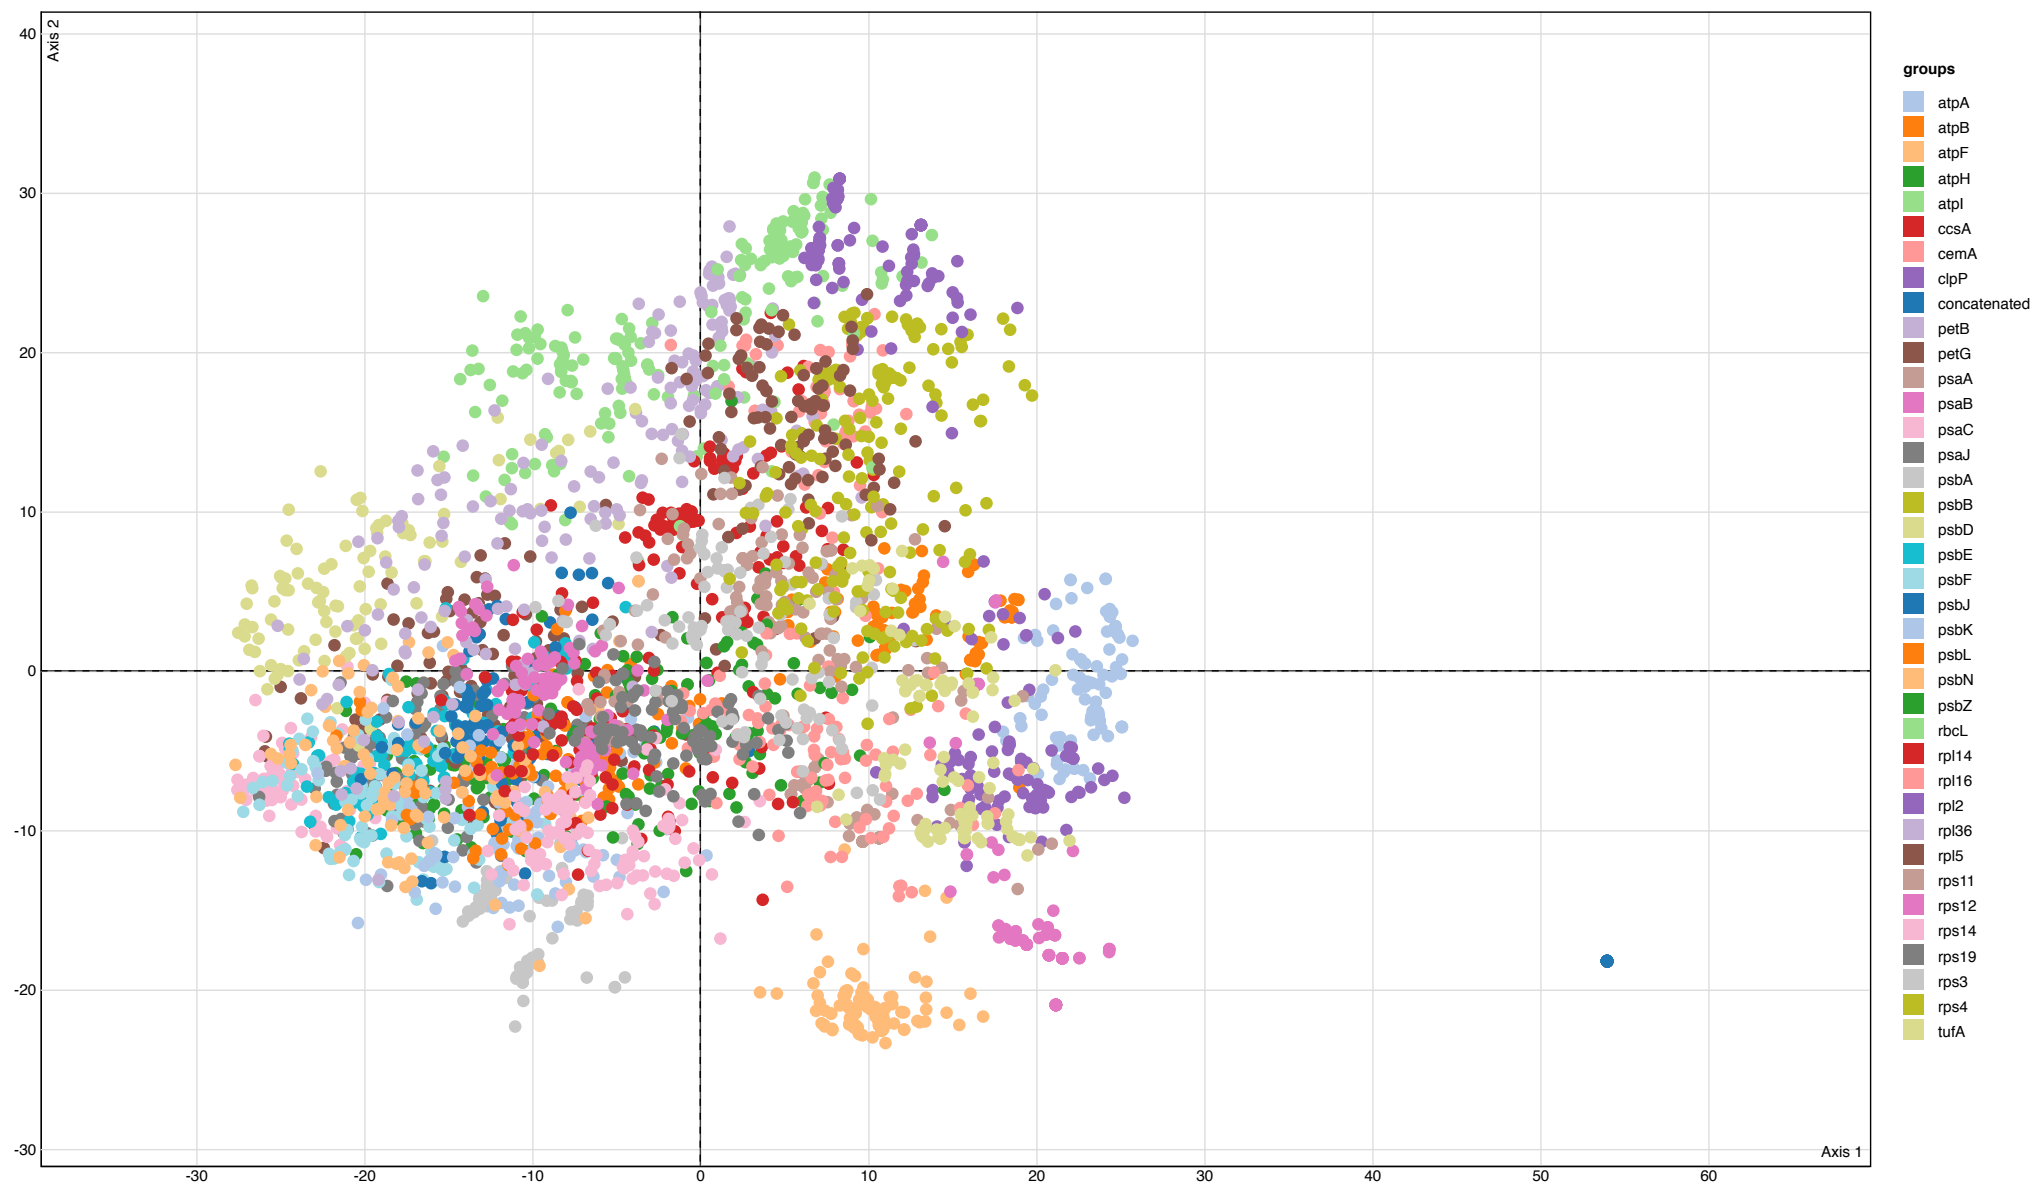

Supplement: supplementary_alignments_trees.zip [file 1_2.pdf › supplementary_alignments_trees/Treespace/grouping_1/1_2.pdf]

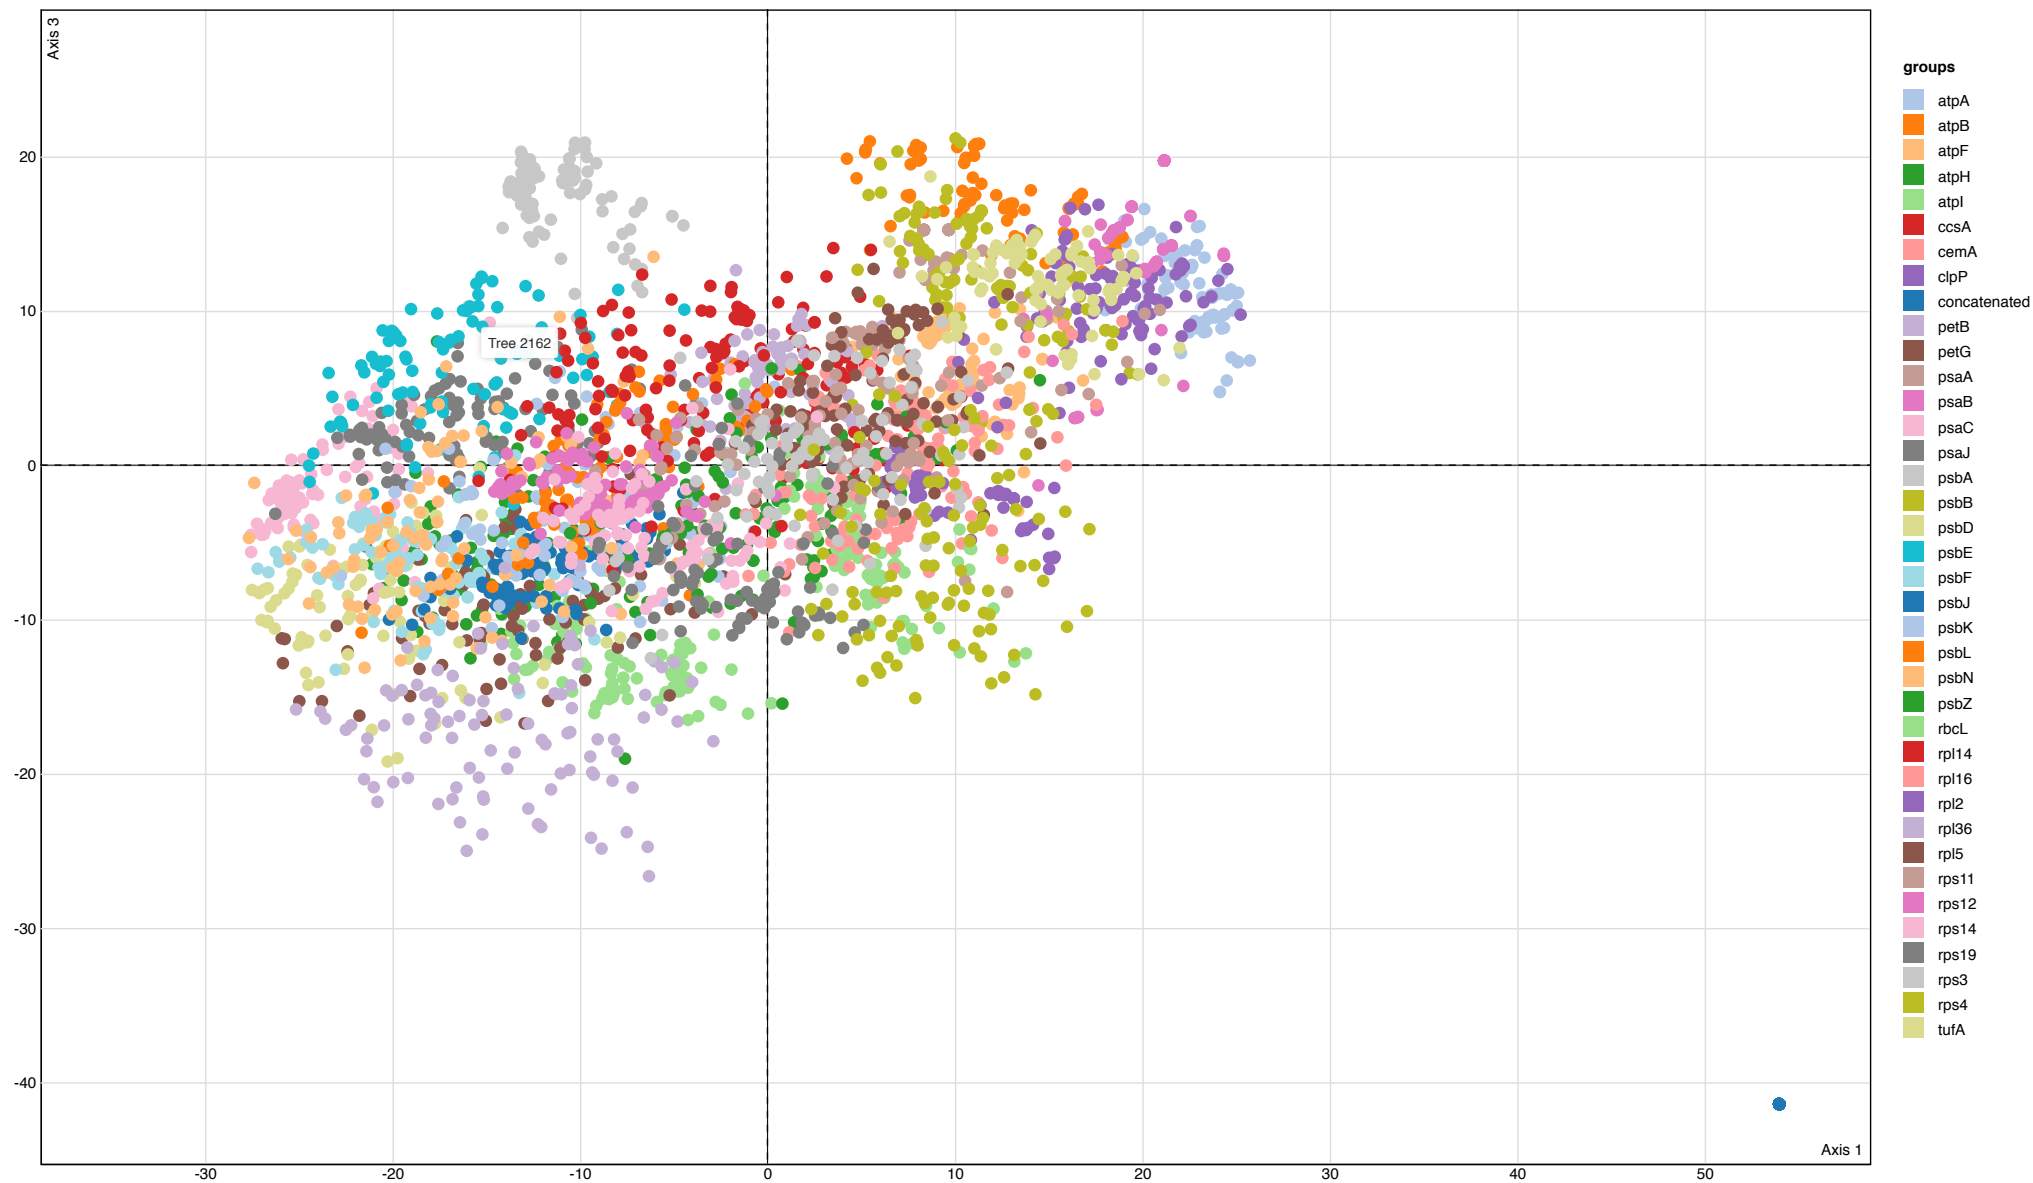

Supplement: supplementary_alignments_trees.zip [file 1_3.pdf › supplementary_alignments_trees/Treespace/grouping_1/1_3.pdf]

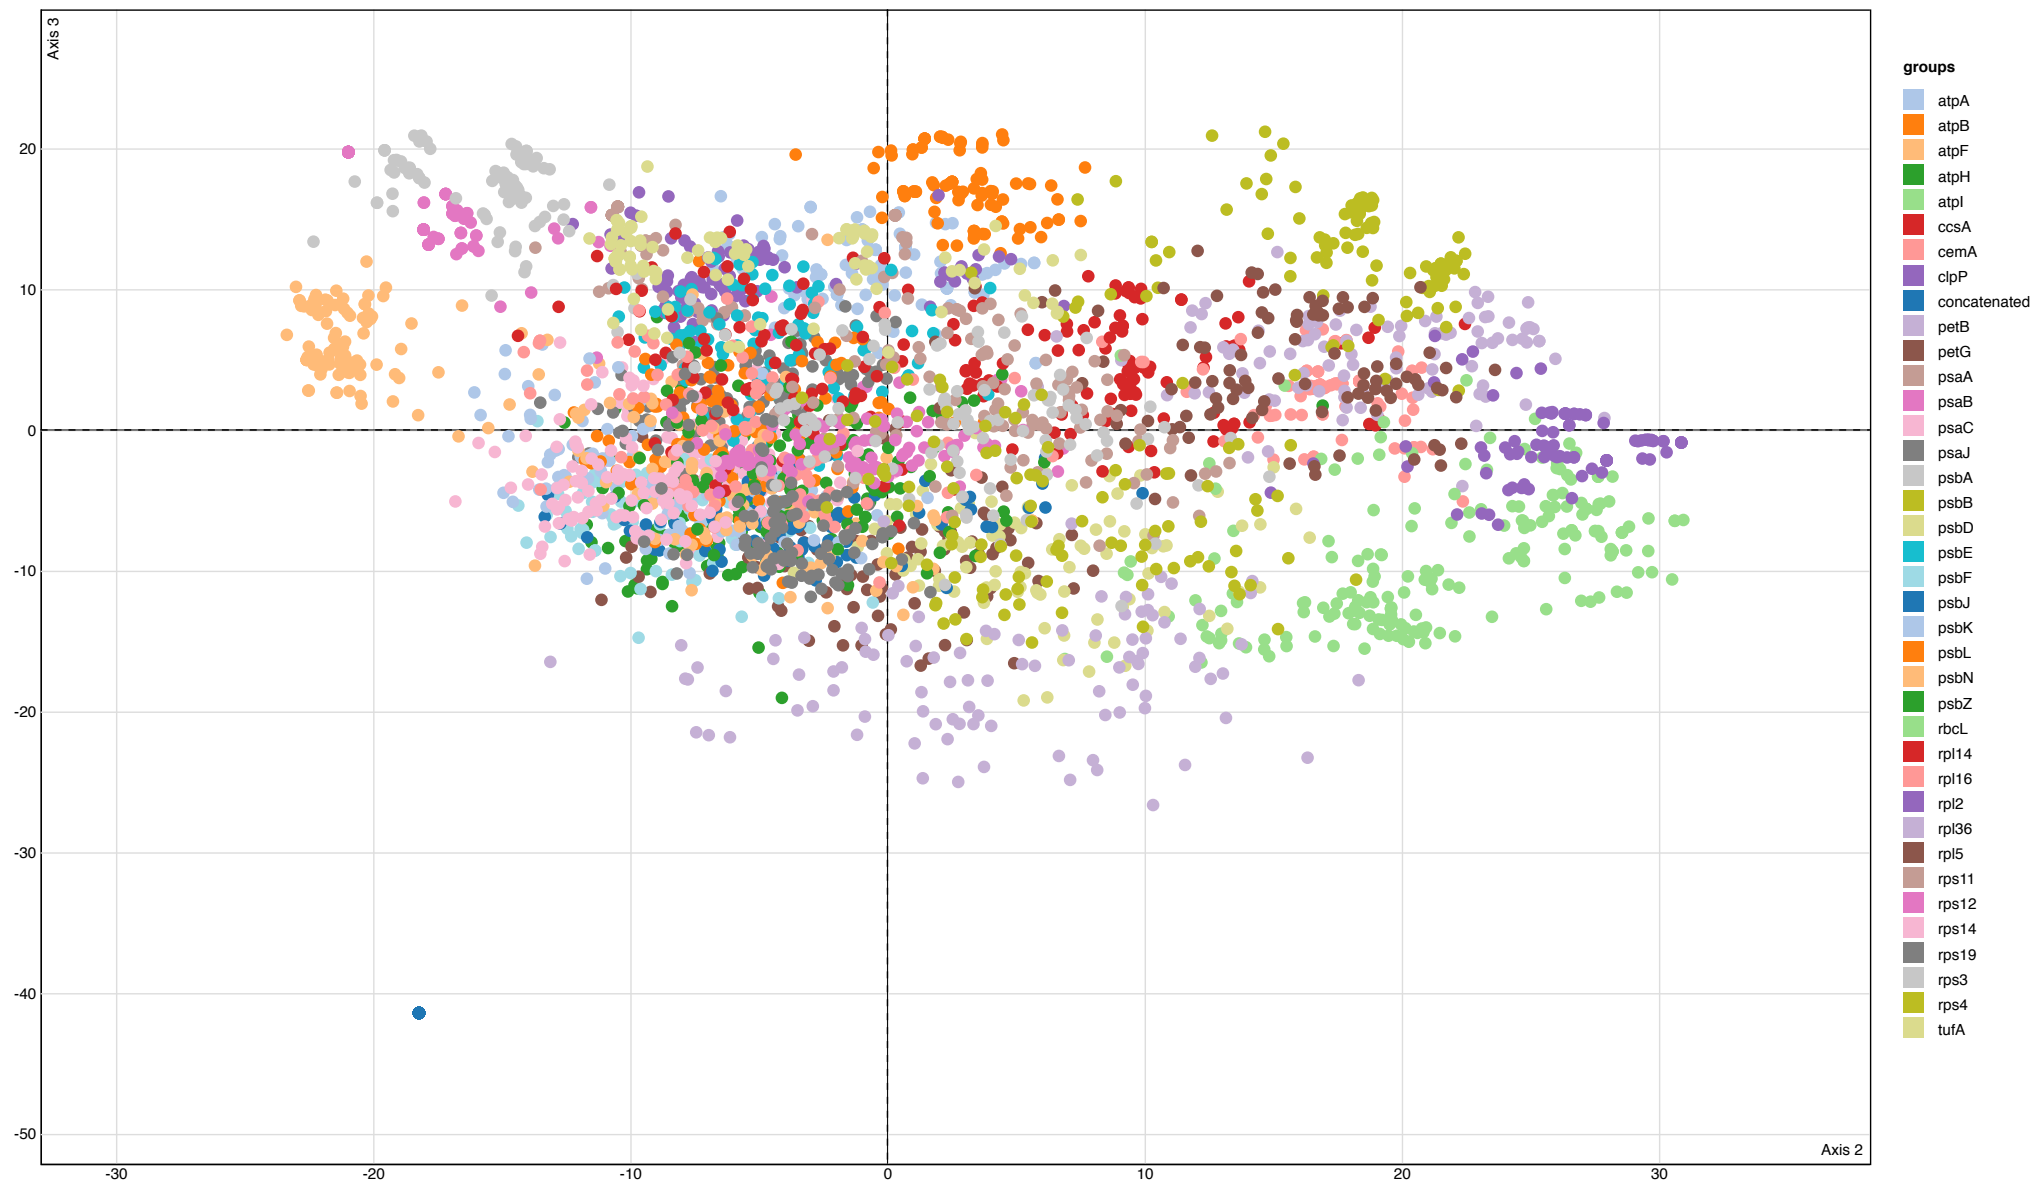

Supplement: supplementary_alignments_trees.zip [file 2_3.pdf › supplementary_alignments_trees/Treespace/grouping_1/2_3.pdf]

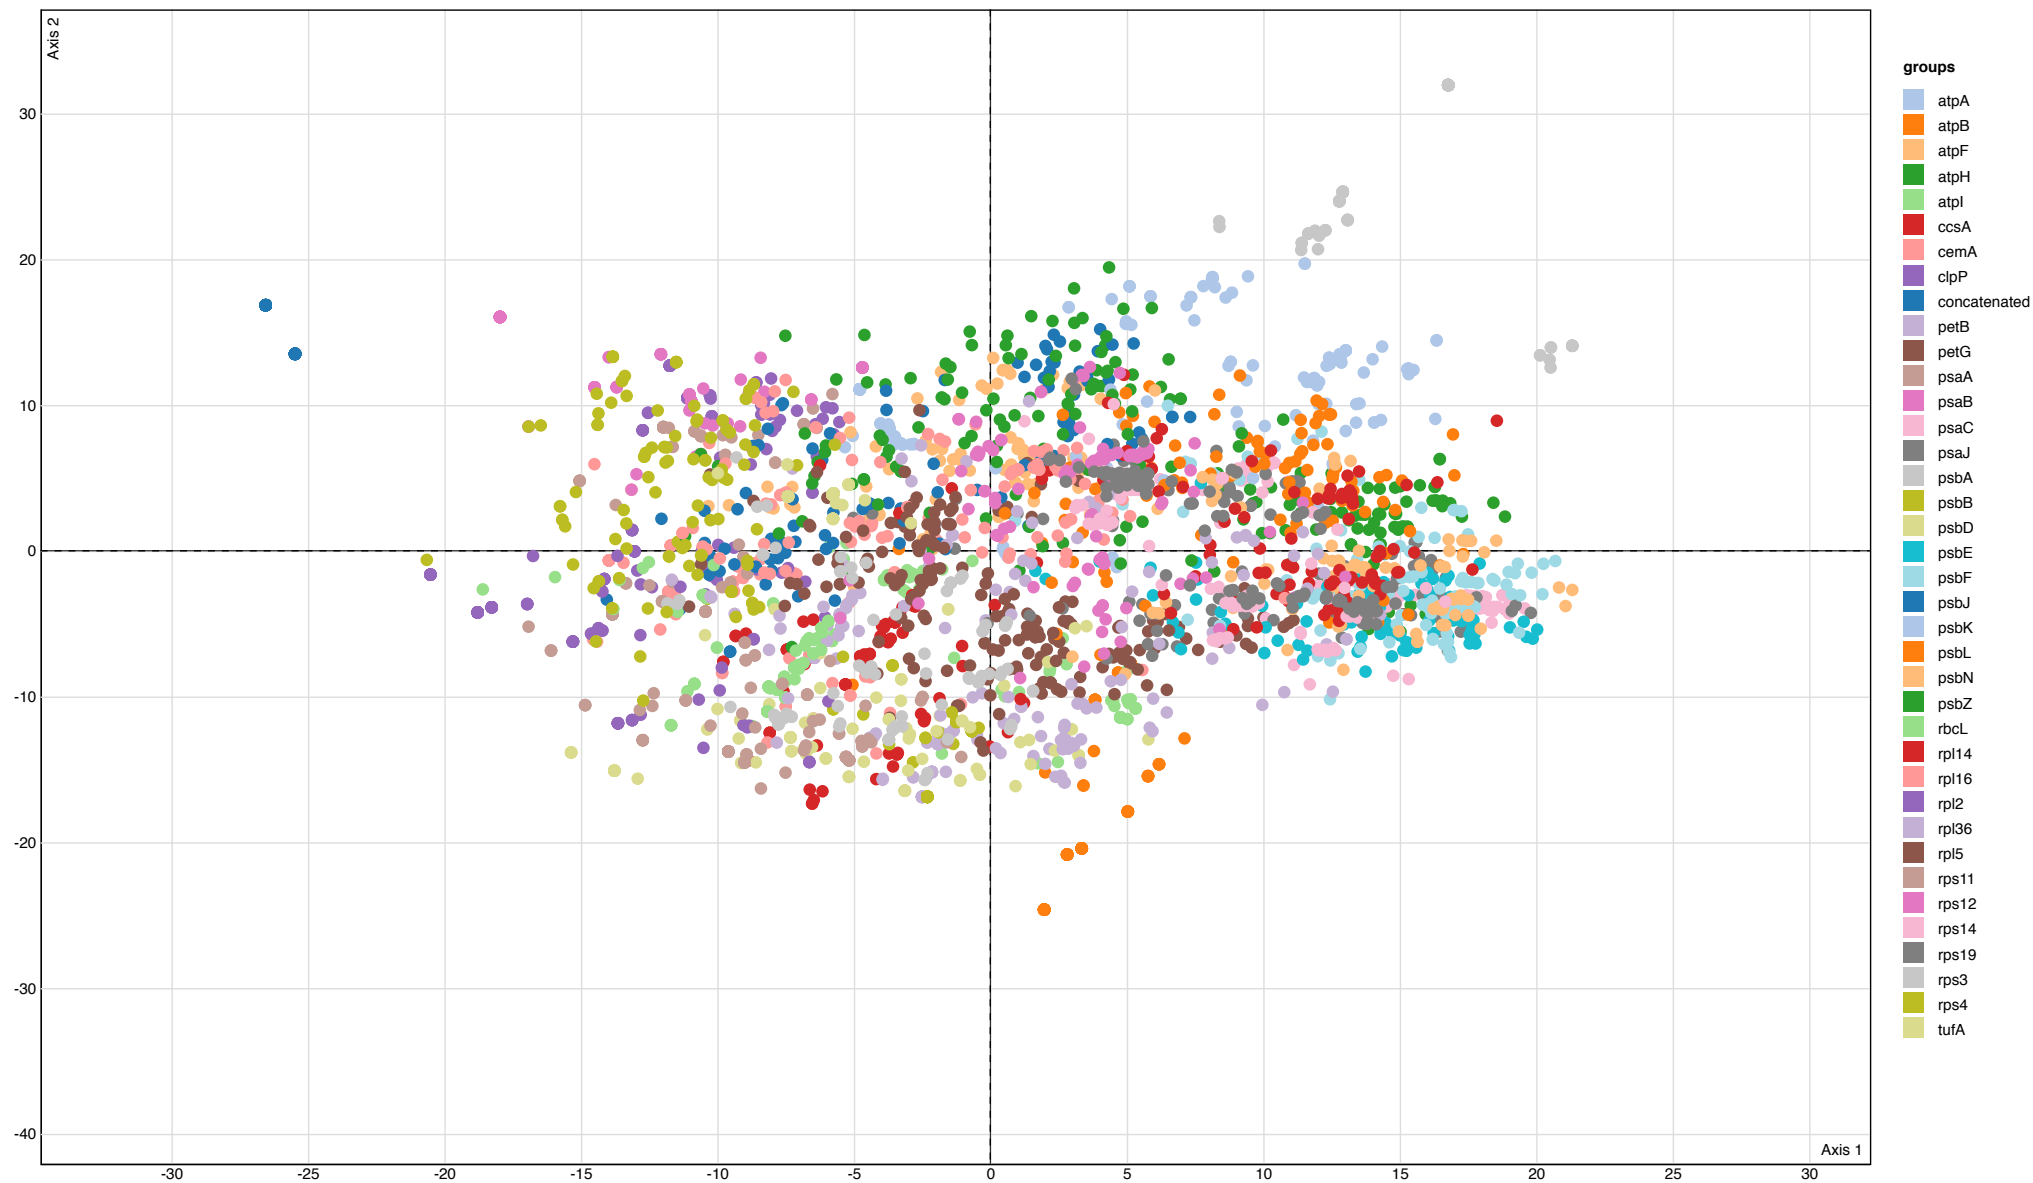

Supplement: supplementary_alignments_trees.zip [file 1_2.pdf › supplementary_alignments_trees/Treespace/grouping_2/1_2.pdf]

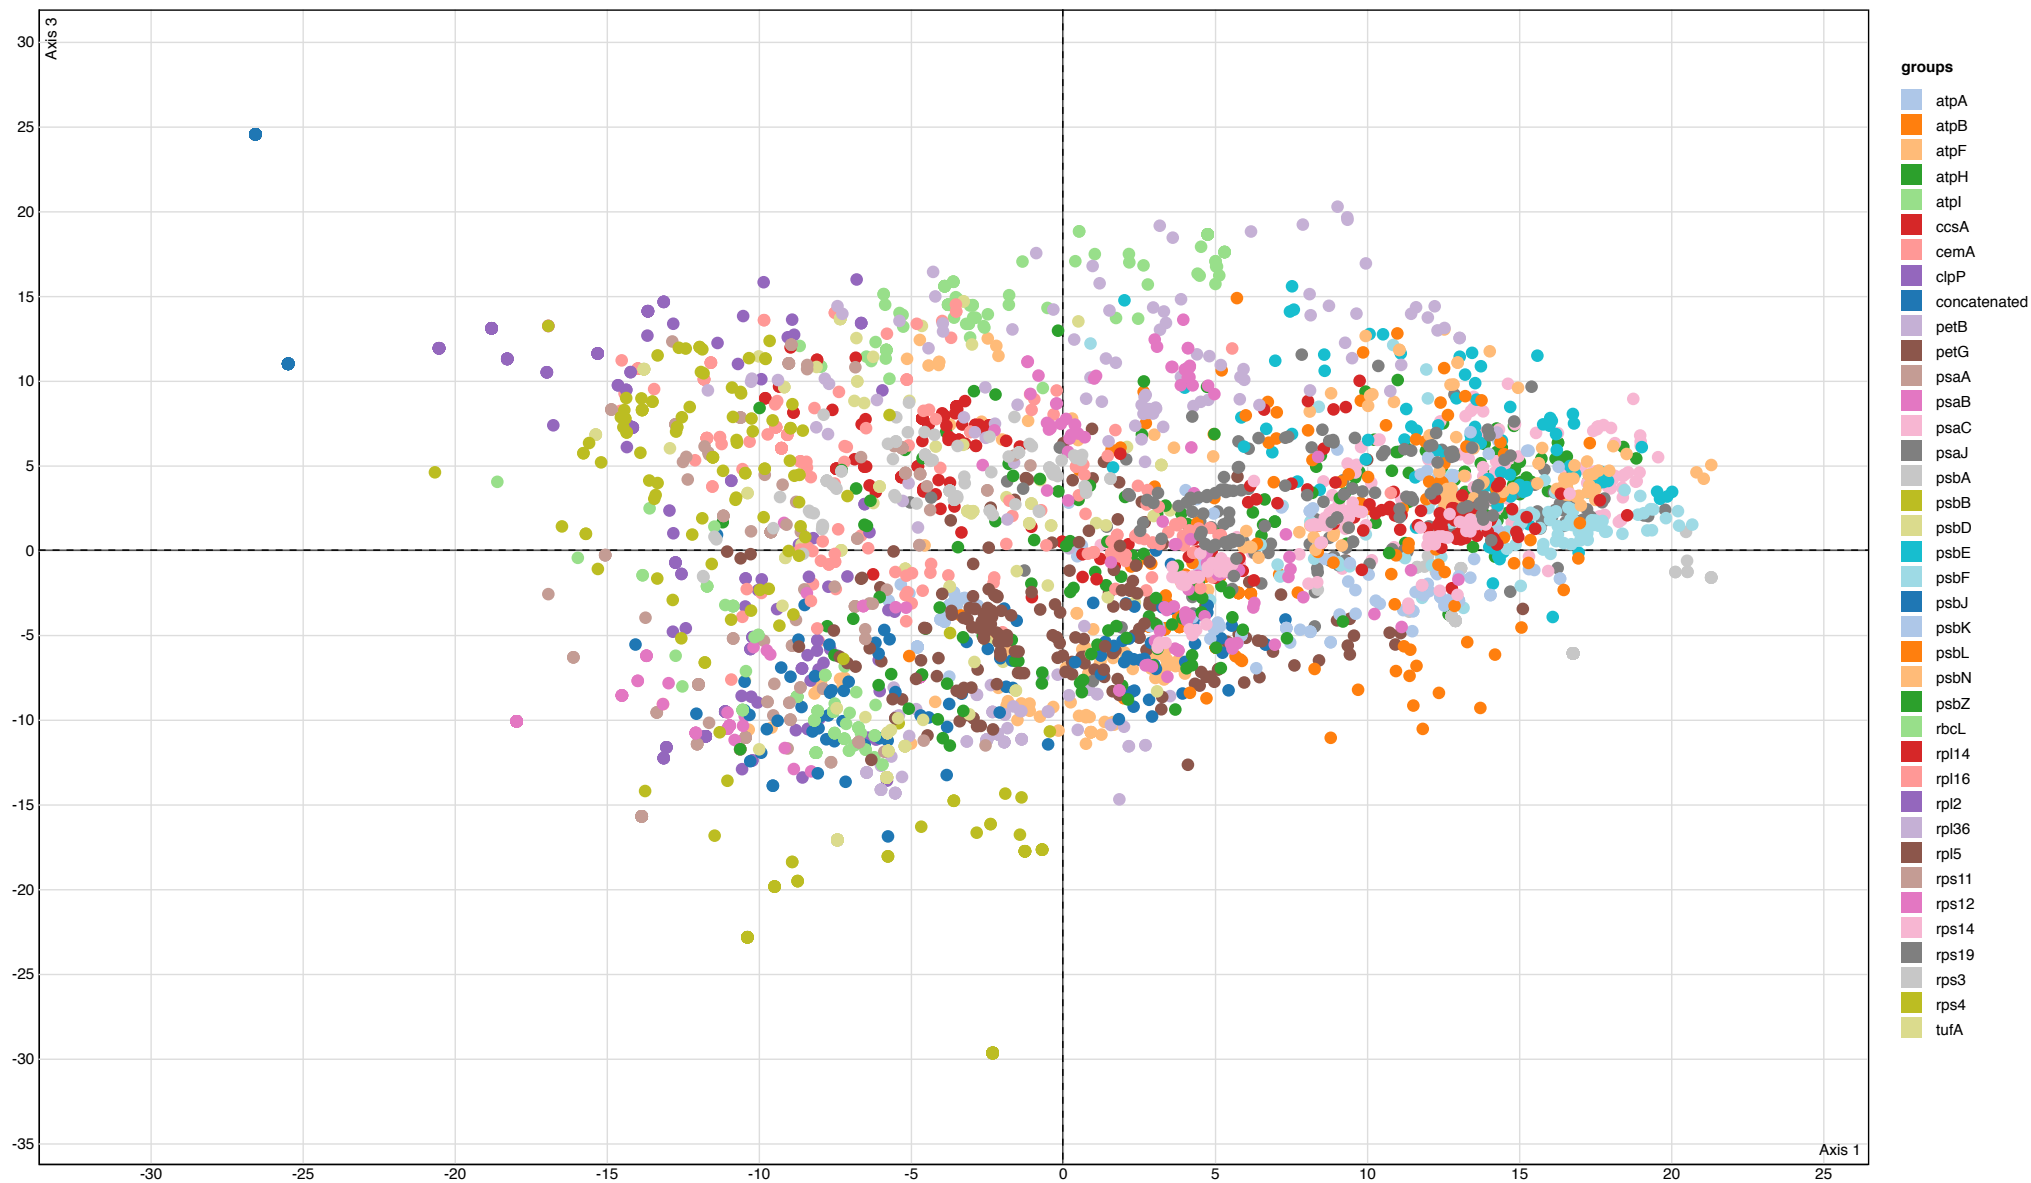

Supplement: supplementary_alignments_trees.zip [file 1_3.pdf › supplementary_alignments_trees/Treespace/grouping_2/1_3.pdf]

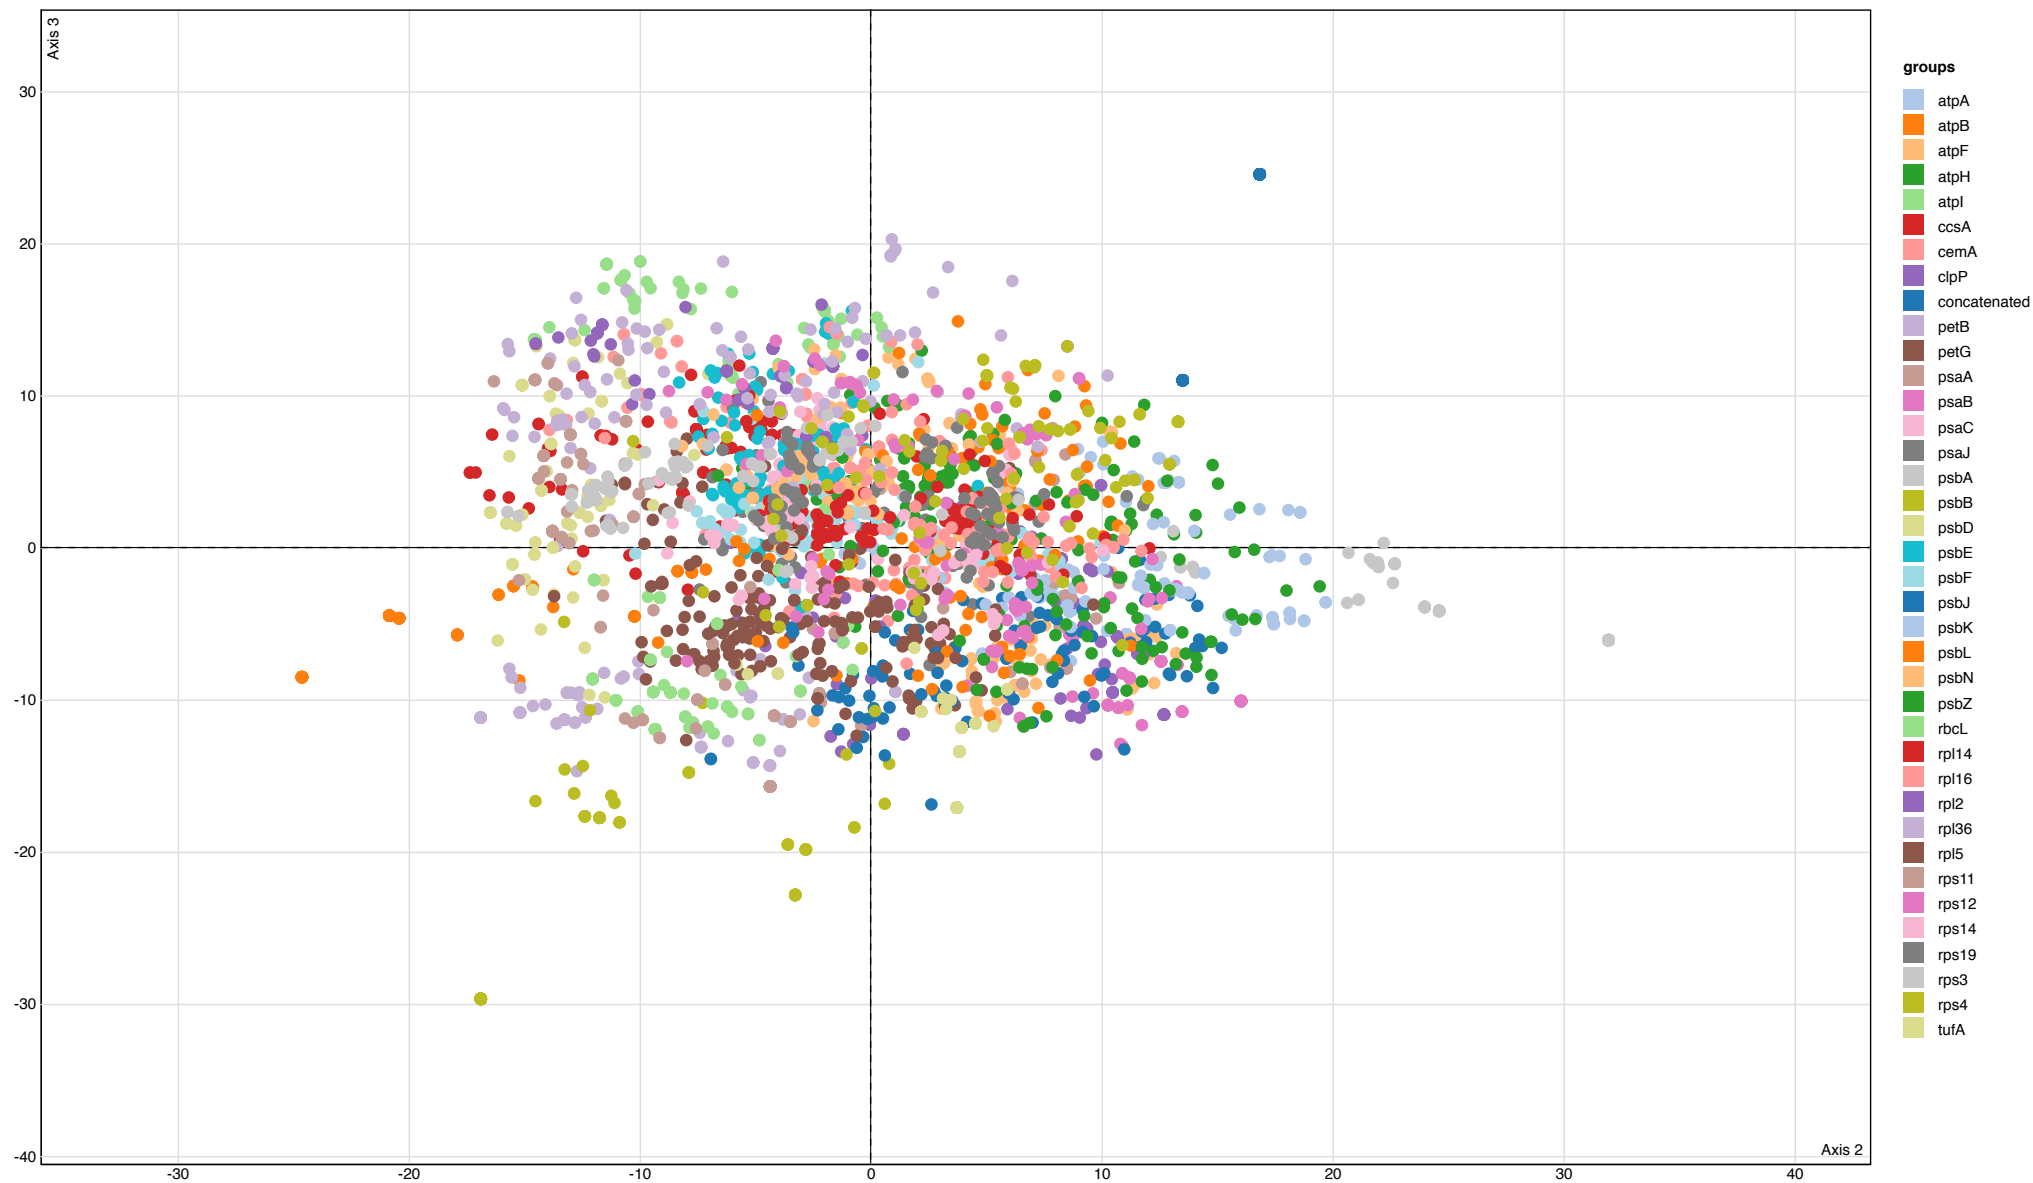

Supplement: supplementary_alignments_trees.zip [file 2_3.pdf › supplementary_alignments_trees/Treespace/grouping_2/2_3.pdf]

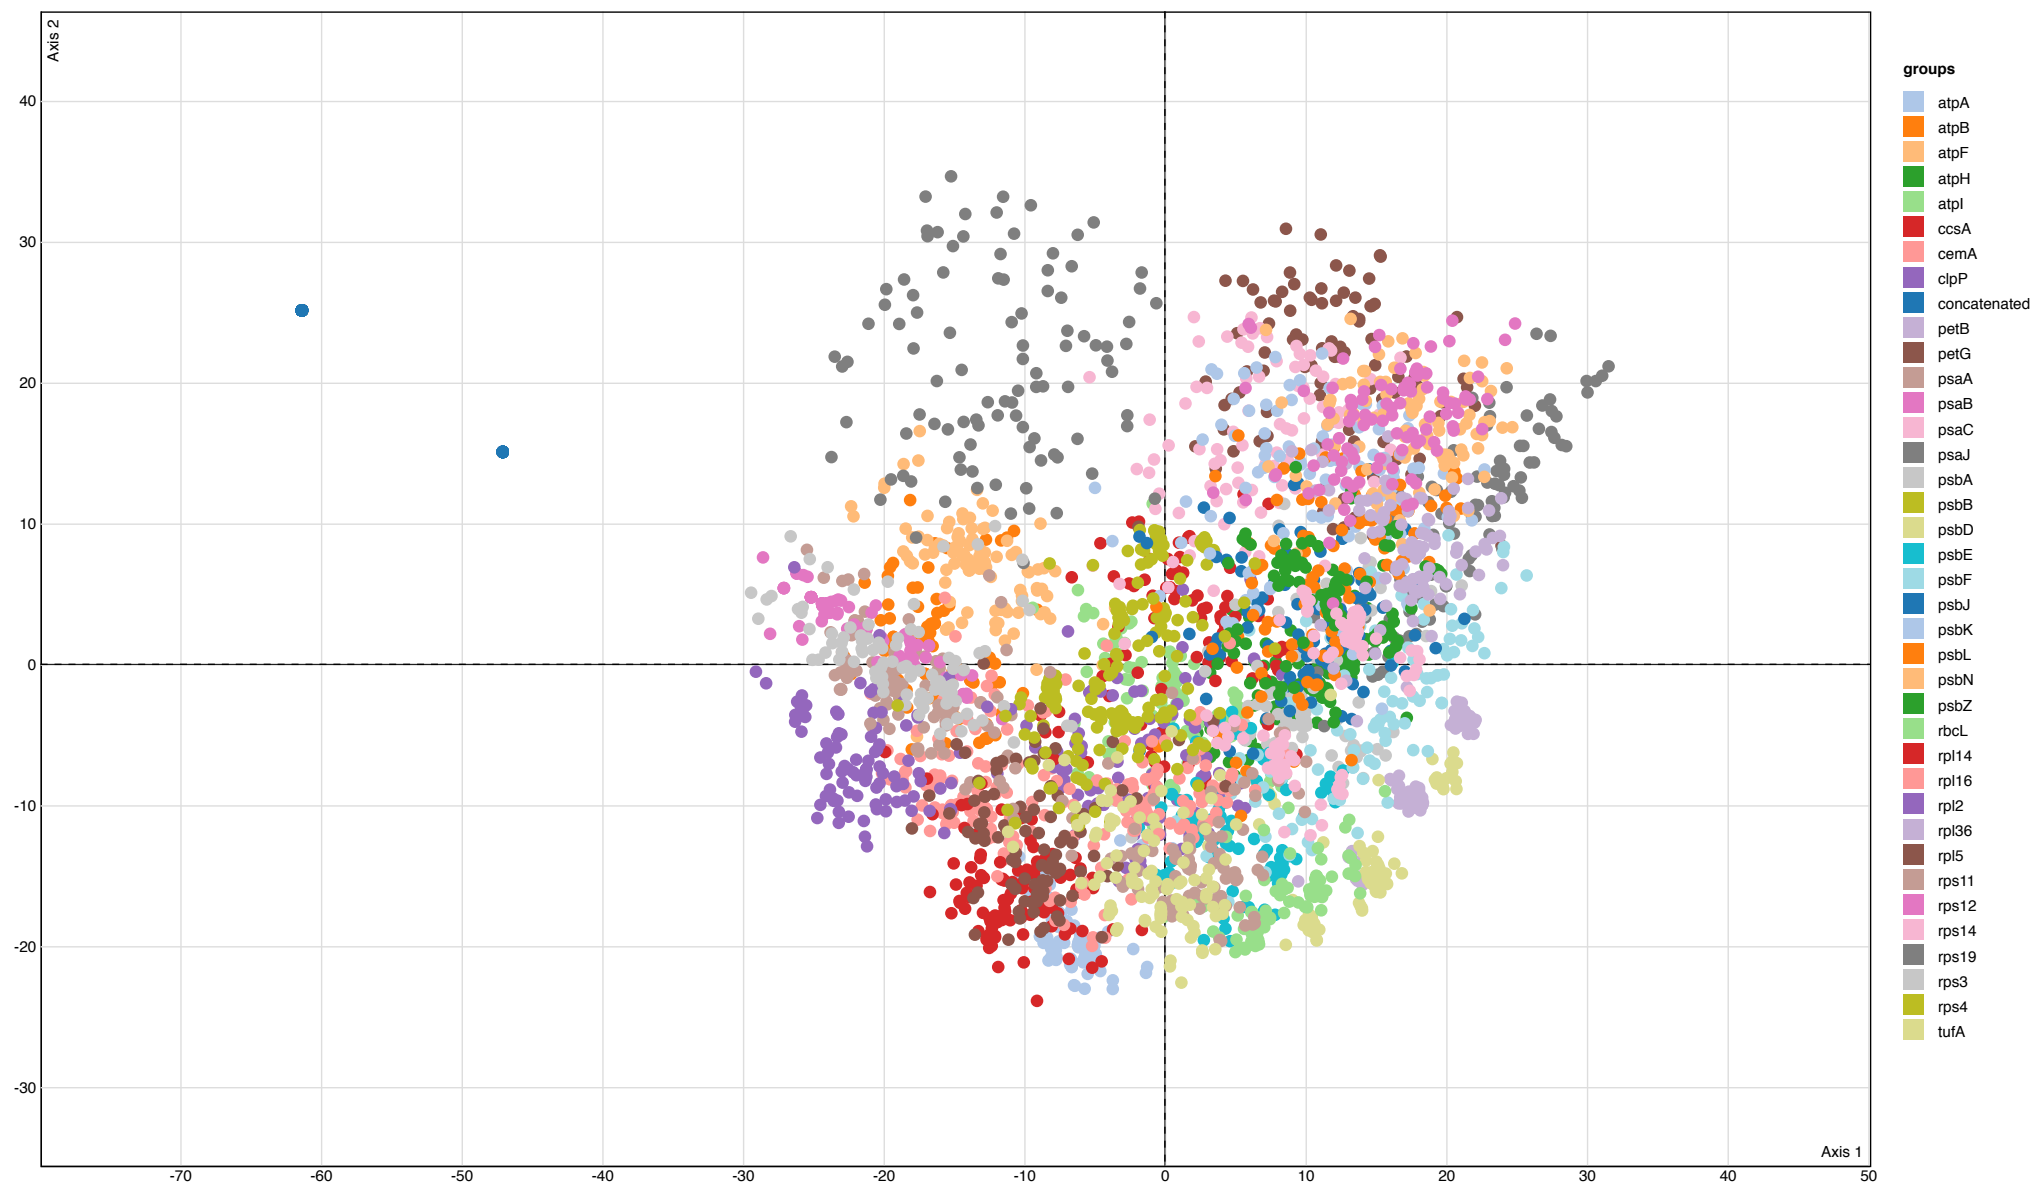

Supplement: supplementary_alignments_trees.zip [file 1_2.pdf › supplementary_alignments_trees/Treespace/grouping_4/1_2.pdf]

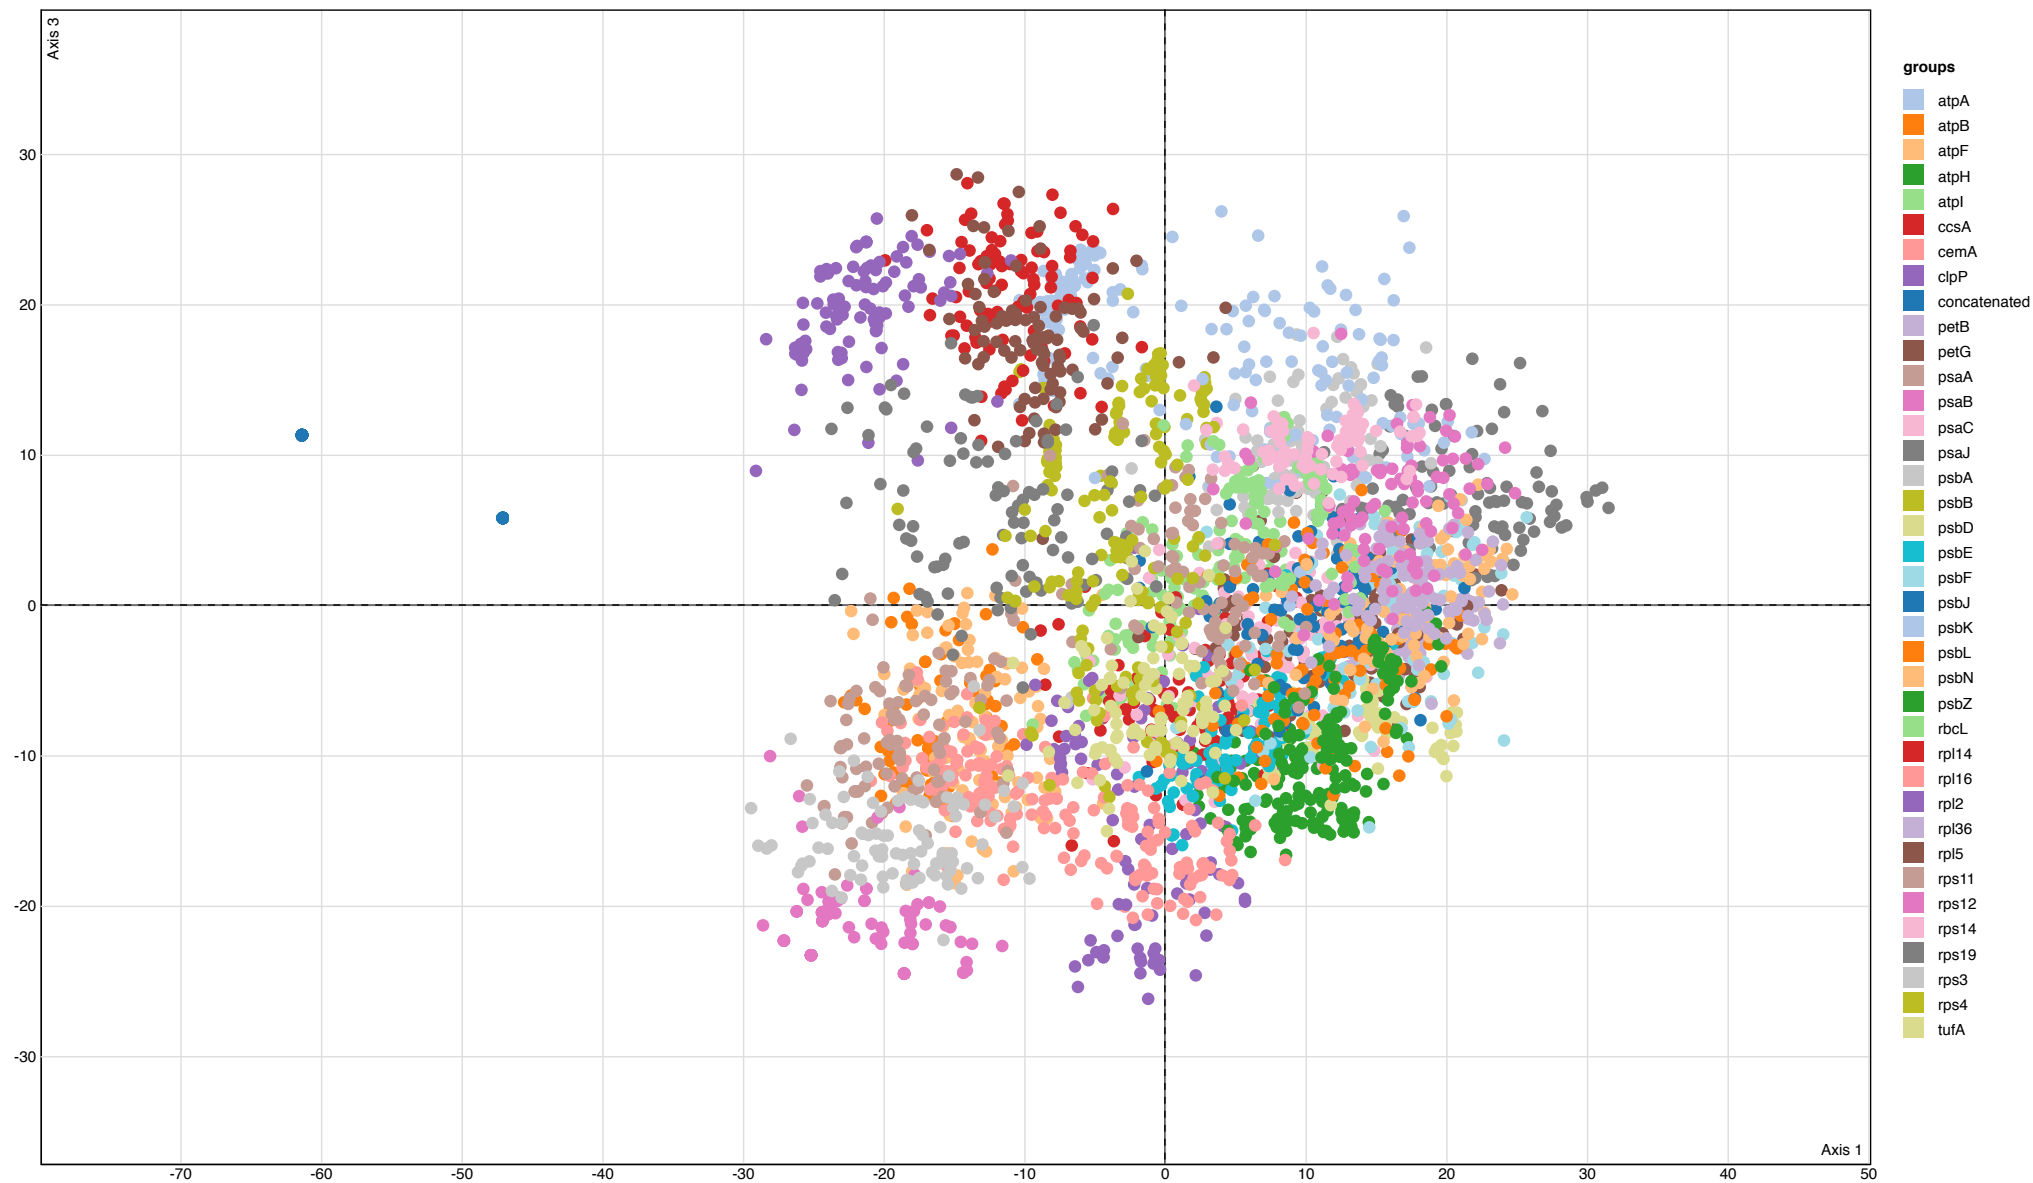

Supplement: supplementary_alignments_trees.zip [file 1_3.pdf › supplementary_alignments_trees/Treespace/grouping_4/1_3.pdf]

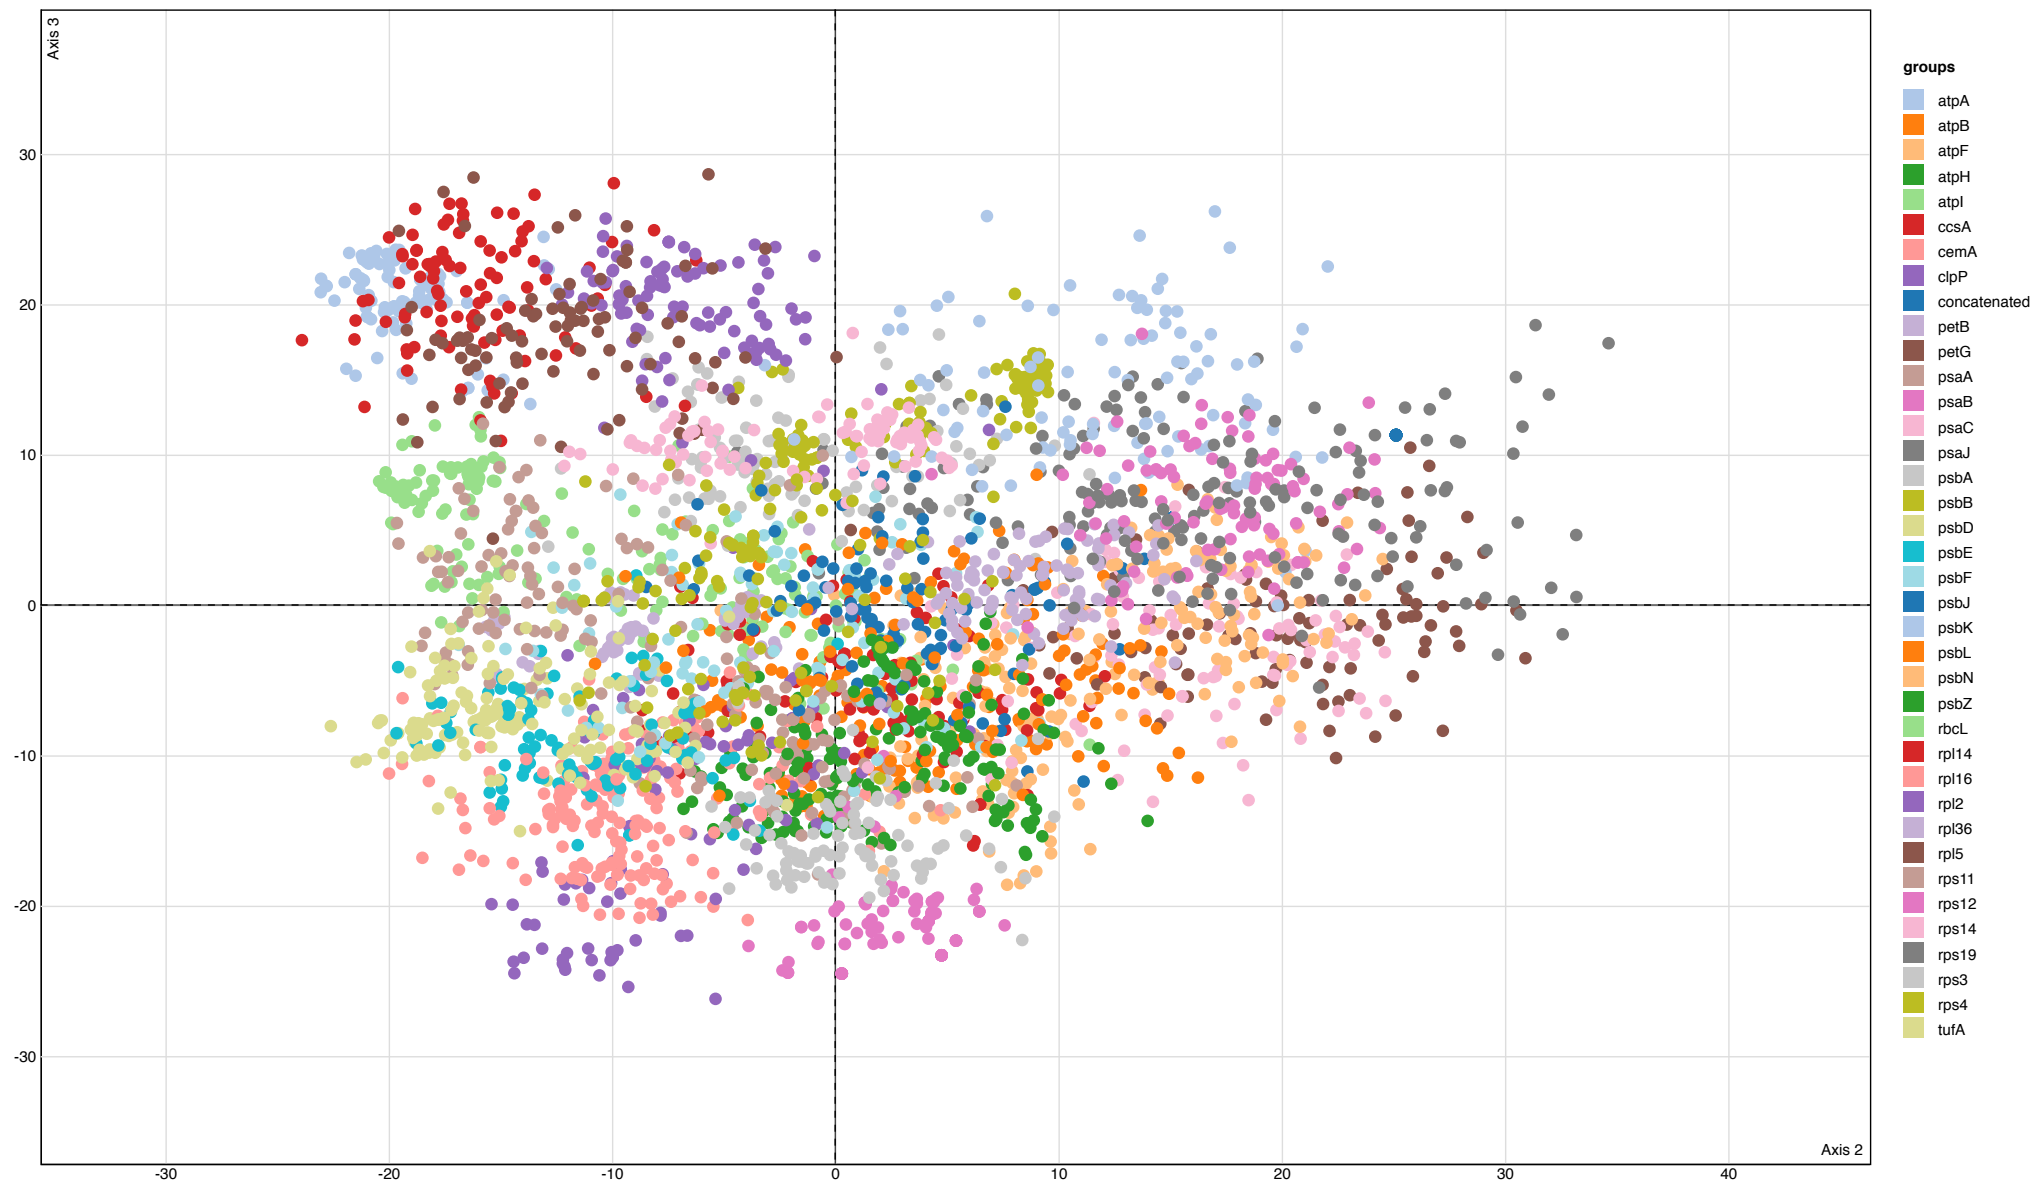

Supplement: supplementary_alignments_trees.zip [file 2_3.pdf › supplementary_alignments_trees/Treespace/grouping_4/2_3.pdf]

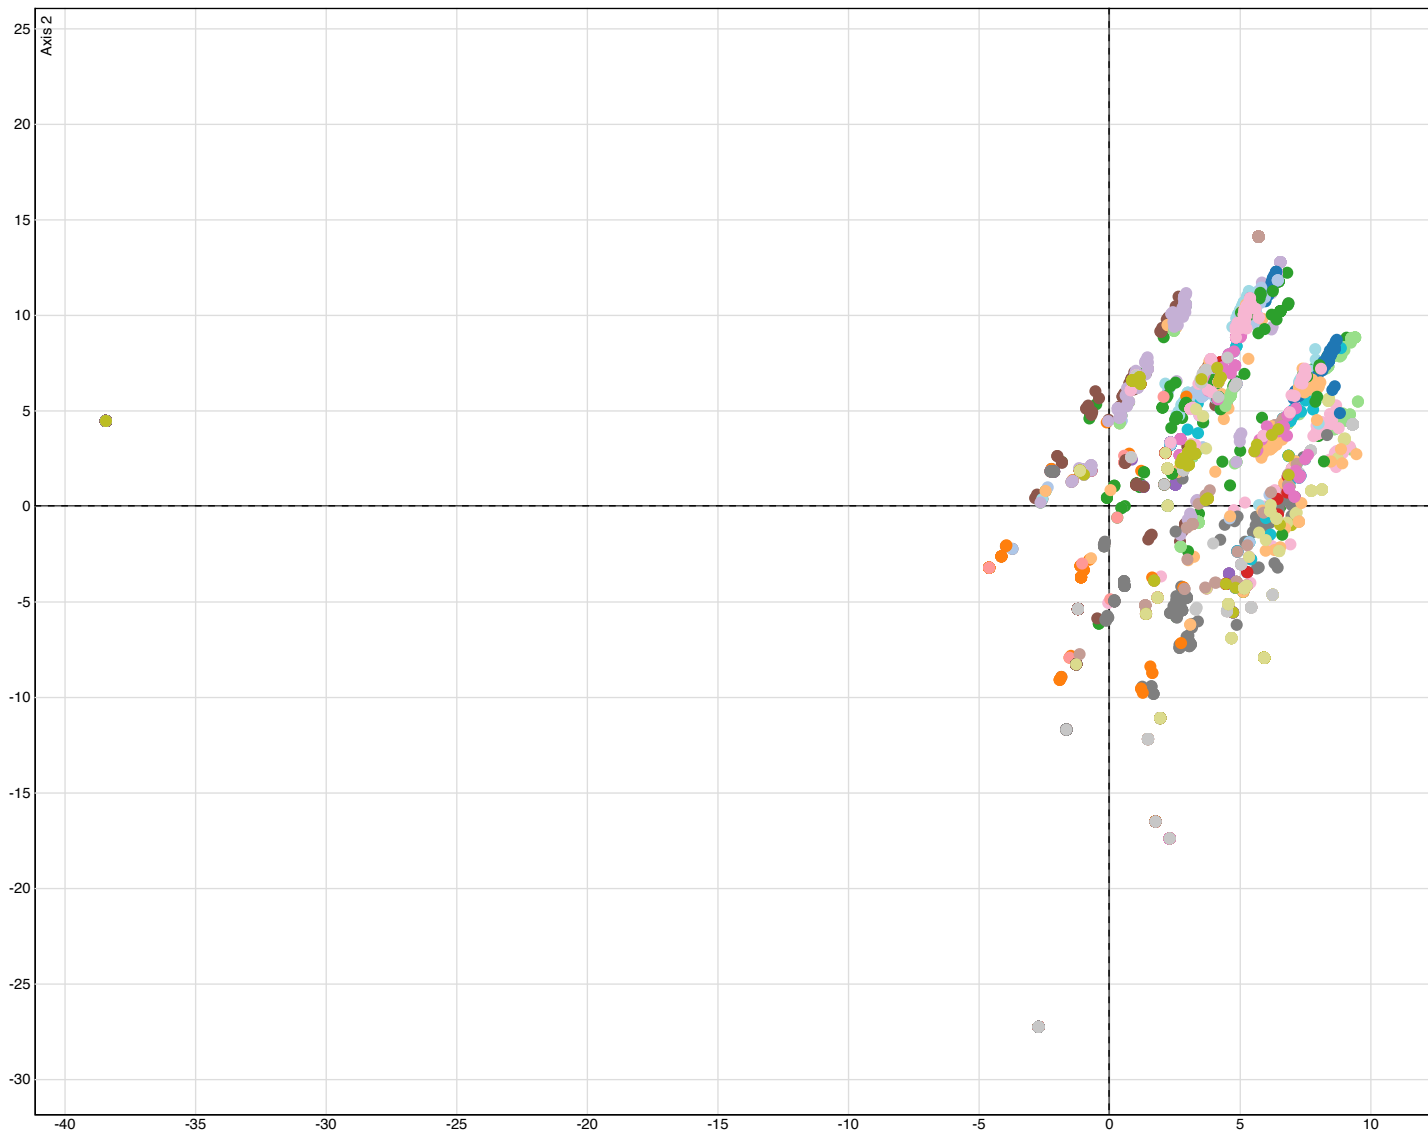

Supplement: supplementary_alignments_trees.zip [file 1_2.pdf › supplementary_alignments_trees/Treespace/grouping_5/1_2.pdf]

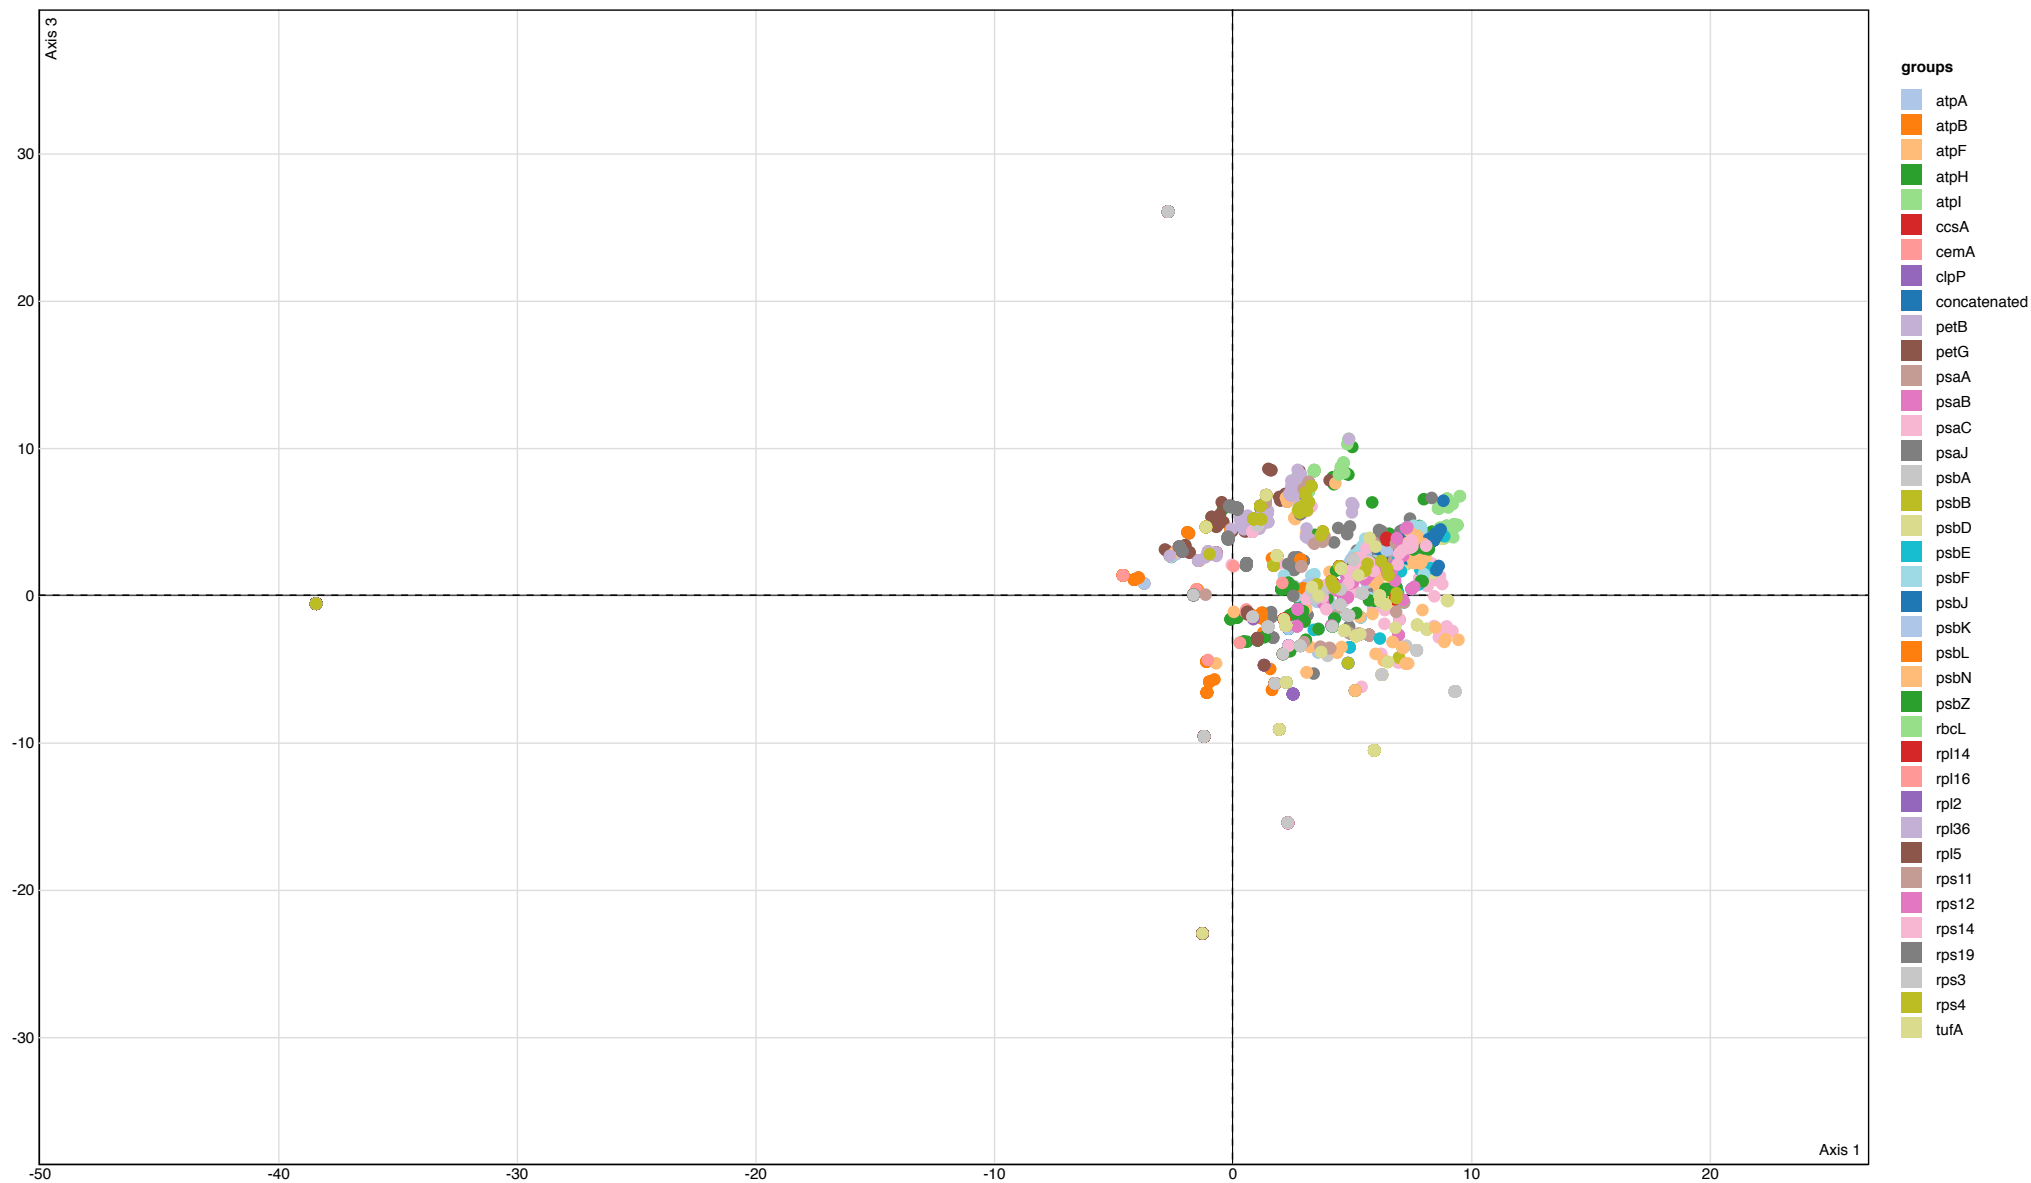

Supplement: supplementary_alignments_trees.zip [file 1_3.pdf › supplementary_alignments_trees/Treespace/grouping_5/1_3.pdf]

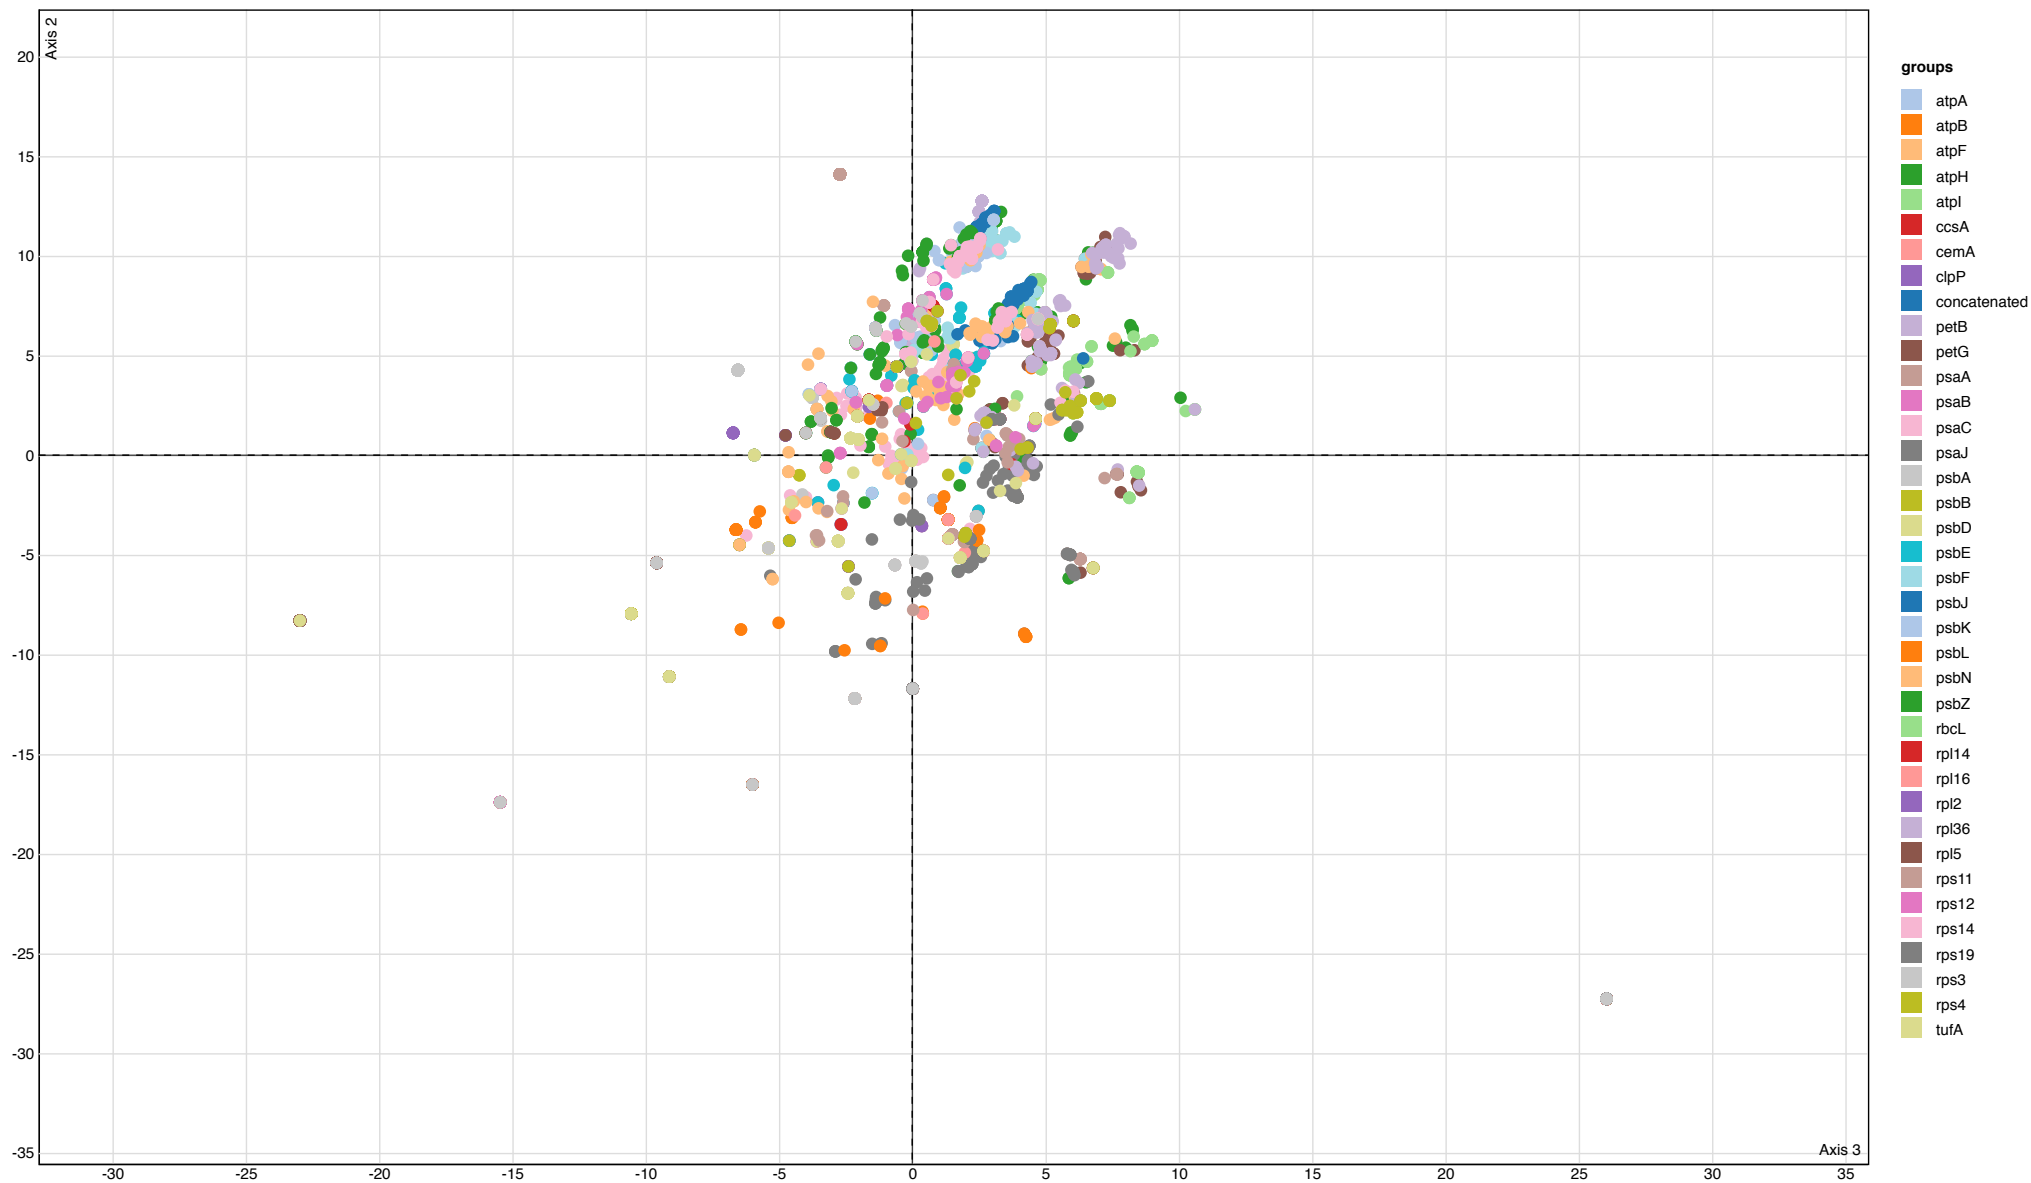

Supplement: supplementary_alignments_trees.zip [file 2_3.pdf › supplementary_alignments_trees/Treespace/grouping_5/2_3.pdf]
